# Supplementary material for: Automated Discovery of Tissue-Targeting Enhancers and Transcription Factors from Binding Motif and Gene Function Data
Source: PLOS journal article supplement (doi:10.1371/journal.pcbi.1003449), 2014-01-30

### Varying number of top TFs used

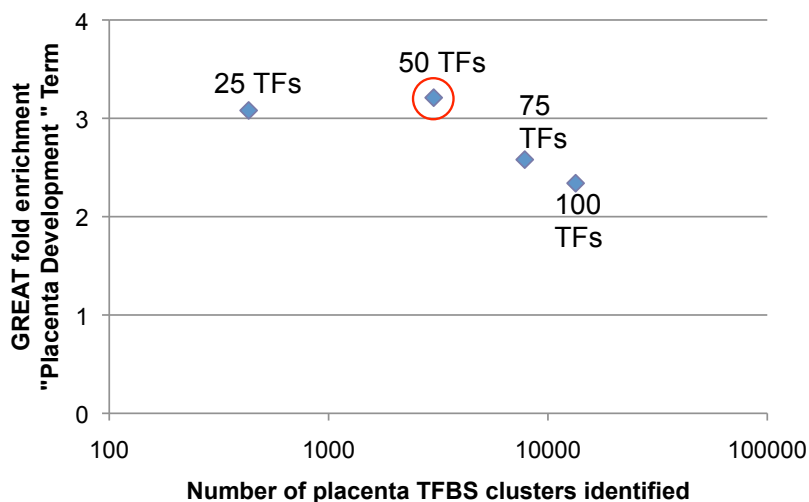

### Varying number of non-overlapping placenta TFBS used

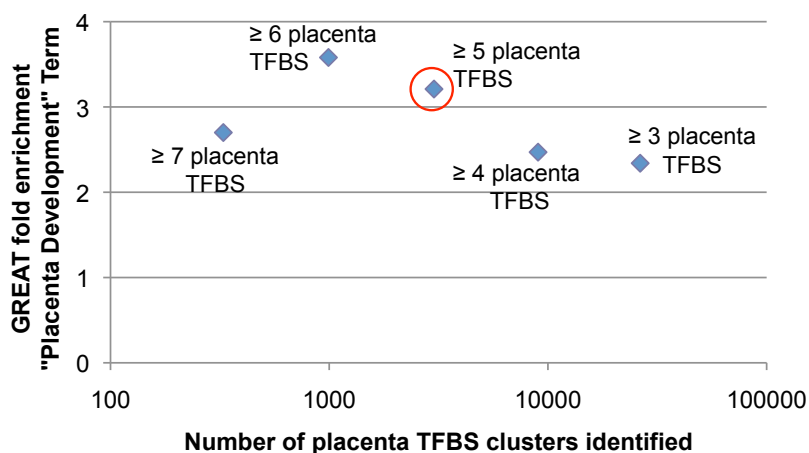

### Varying number of non-overlapping TFBS used: $\geq 3$ are placenta TFBS

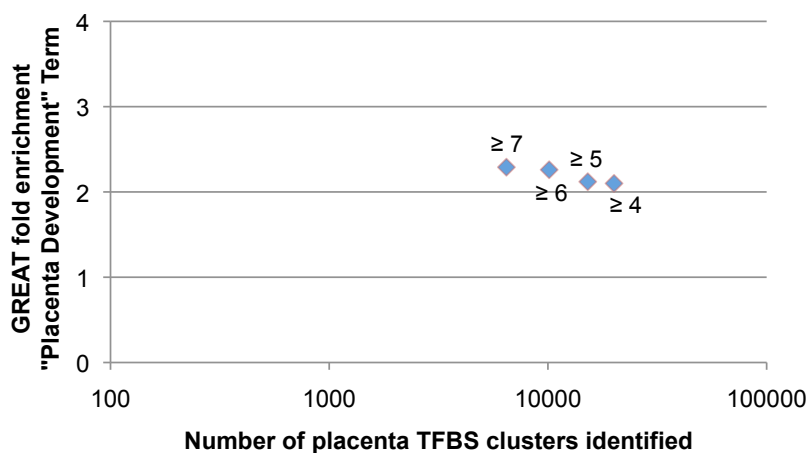

Supplement: S2 (10.1371/journal.pcbi.1003449.s002) [file journal.pcbi.1003449.s002]
