# Supplementary material for: Automated Discovery of Tissue-Targeting Enhancers and Transcription Factors from Binding Motif and Gene Function Data
Source: PLOS journal article supplement (doi:10.1371/journal.pcbi.1003449), 2014-01-30

## TSC activity compared to neocortex

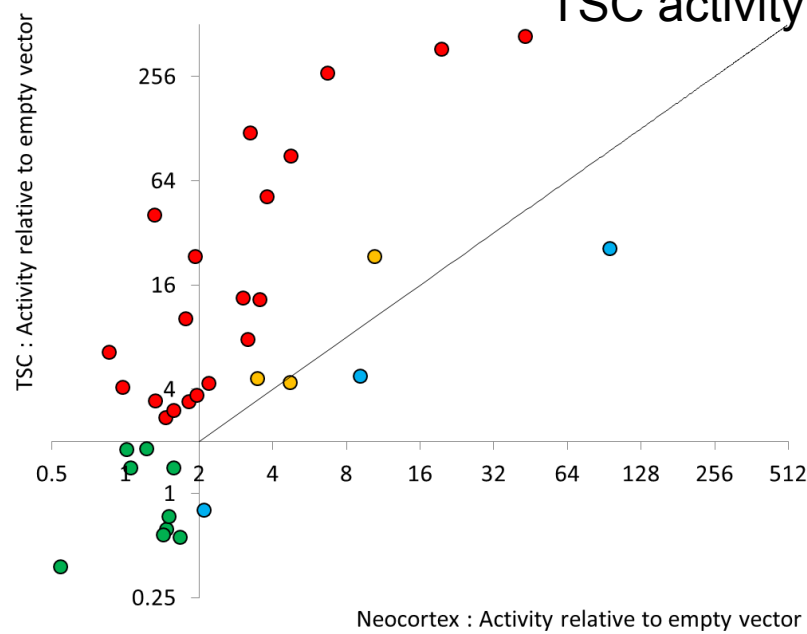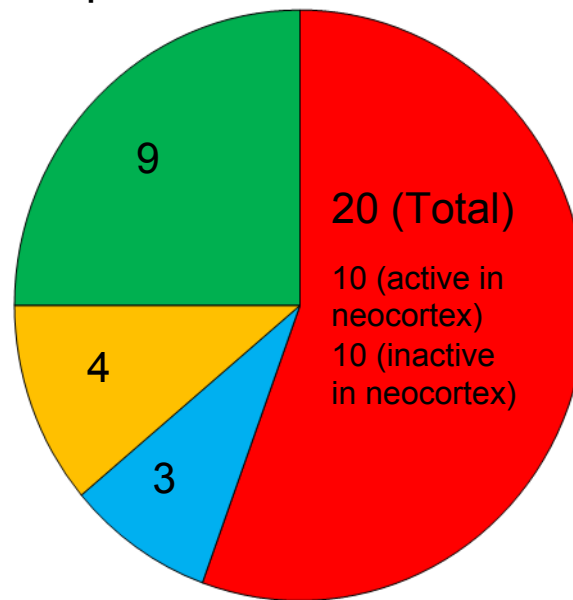

- Significantly higher in TSC compared to neocortex
- Significantly higher in neocortex compared to TSC
- Active in TSC and neocortex, significantly higher in none
- Inactive in both cell types

## TGC activity compared to neocortex

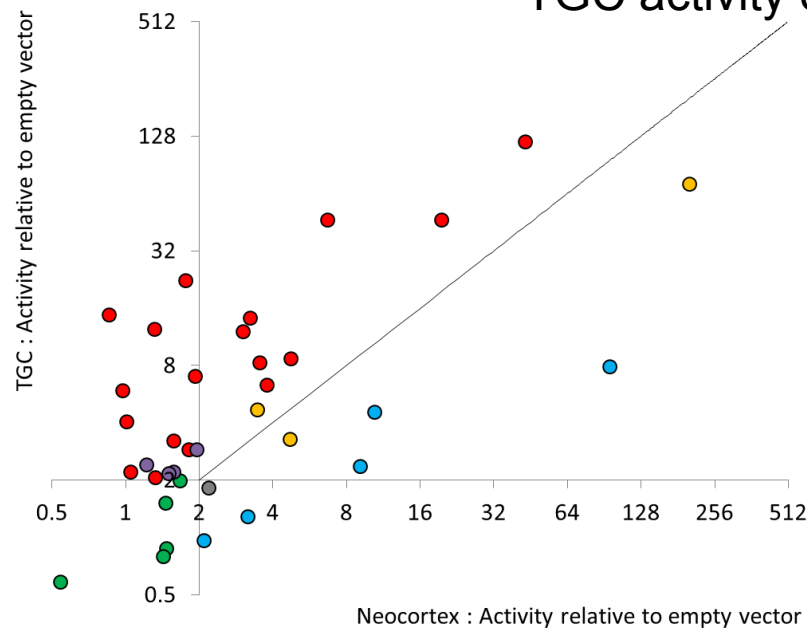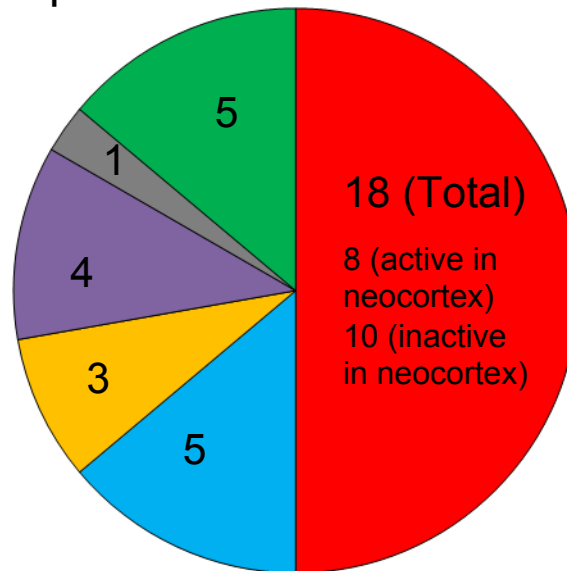

- Significantly higher in TGC compared to neocortex
- Significantly higher in neocortex compared to TGC
- Active in TGC and neocortex, significantly higher in none
- Active in TGC, but not significantly higher than neocortex
- Active in neocortex, but not significantly higher than TGC
- Inactive in both cell types

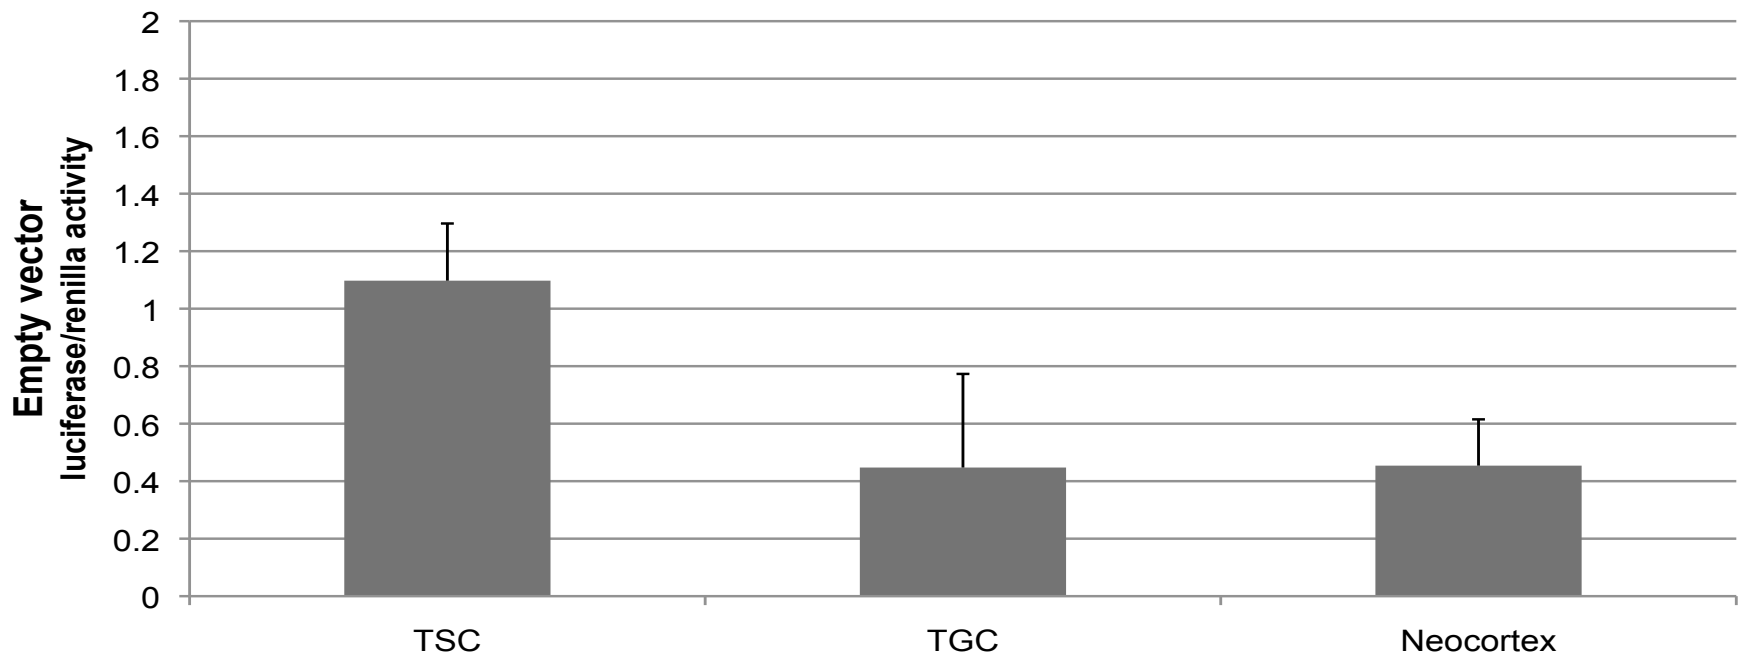

Supplement: S7 (10.1371/journal.pcbi.1003449.s007) [file journal.pcbi.1003449.s007]
