# Supplementary material for: Automated Discovery of Tissue-Targeting Enhancers and Transcription Factors from Binding Motif and Gene Function Data
Source: PLOS journal article supplement (doi:10.1371/journal.pcbi.1003449), 2014-01-30

TSC Enhancers  
(H3k27Ac and H3k4me1)

Placenta TFBS  
clusters

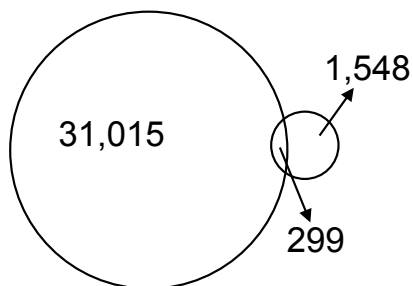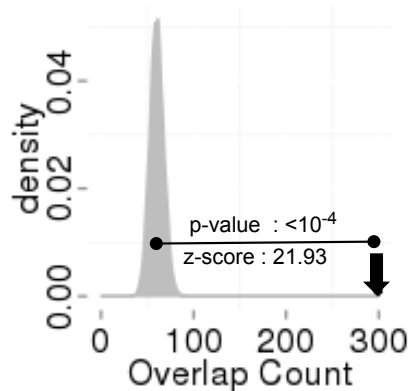

TSC H3k9me3  
peaks

Placenta TFBS  
clusters

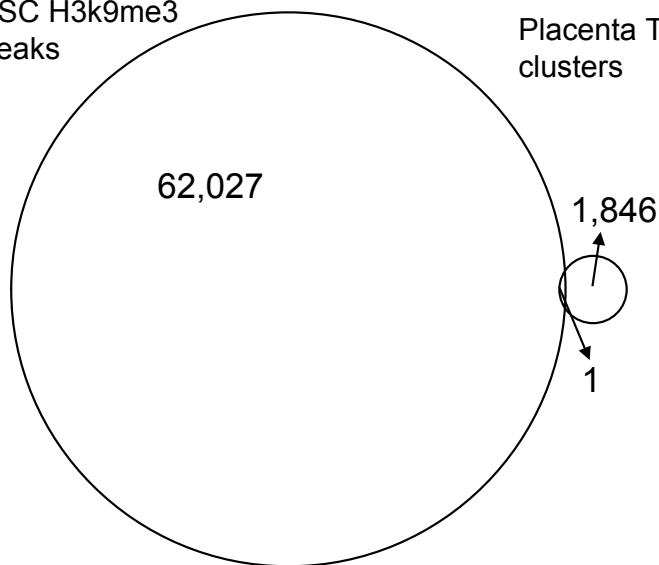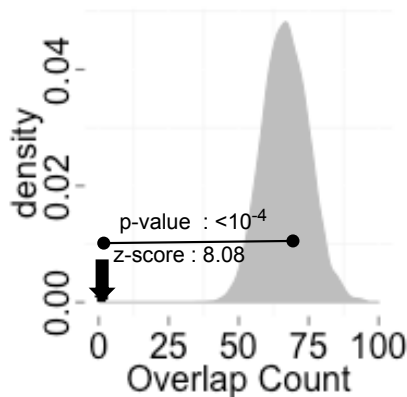

TSC H3k27me3  
peaks

Placenta TFBS  
clusters

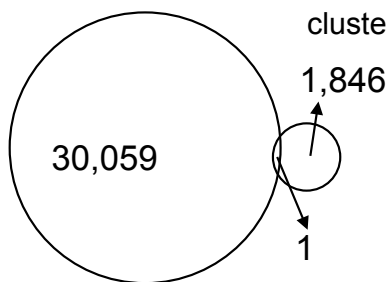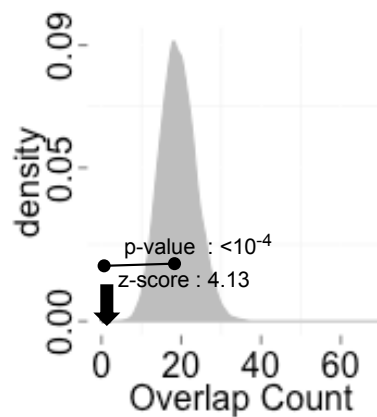

Supplement: S9 (10.1371/journal.pcbi.1003449.s009) [file journal.pcbi.1003449.s009]
