# Supplementary material for: Automated Discovery of Tissue-Targeting Enhancers and Transcription Factors from Binding Motif and Gene Function Data
Source: PLOS journal article supplement (doi:10.1371/journal.pcbi.1003449), 2014-01-30
Supplement: S10 (10.1371/journal.pcbi.1003449.s010) [file journal.pcbi.1003449.s010]

TFs associated with heart development

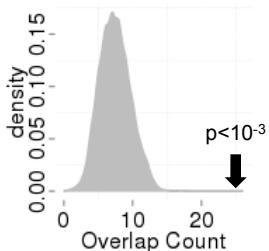

Heart Wilcoxon rank-sum  
p-value:  $2.65 \times 10^{-6}$

TFs associated with pancreas development

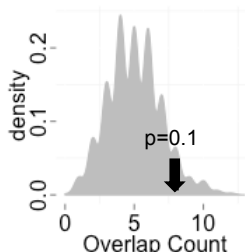

Pancreas Wilcoxon rank-sum  
p-value:  $3.70 \times 10^{-2}$

TFs associated with blood vessel development

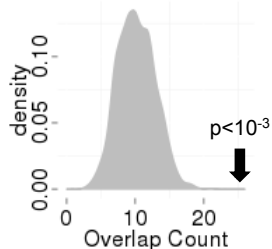

Blood vessel Wilcoxon rank-sum  
p-value:  $1.44 \times 10^{-7}$

TFs associated with bone marrow development

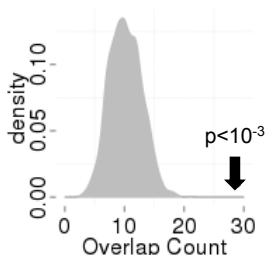

Bone marrow Wilcoxon rank-sum  
p-value:  $6.9 \times 10^{-4}$

TFs associated with liver development

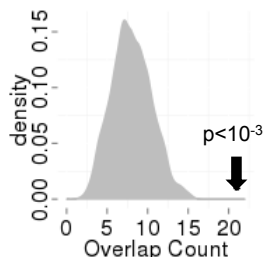

Liver Wilcoxon rank-sum  
p-value:  $8.3 \times 10^{-6}$
