# Supplementary material for: Automated Discovery of Tissue-Targeting Enhancers and Transcription Factors from Binding Motif and Gene Function Data
Source: PLOS journal article supplement (doi:10.1371/journal.pcbi.1003449), 2014-01-30
Supplement: S11 (10.1371/journal.pcbi.1003449.s011) [file journal.pcbi.1003449.s011]

## Sheet: SupplementaryTable1
Motif name	Most likely TF	Category	Notes	PMID
V_RBPJK_01	Rbpj	known	Knockout mouse has placenta defects	7588063
J_NF_kappaB	Nfkb	known	Nfkb has known role in human labor, binding activity detected in term placentas	16843526
L_ETS2_01	Ets2	known	Ets2 is involved in ectoplacental cone proliferation and TS cell renewal. Each was shown using a different mouse model.	9573048, 17977525
B_Zbtb7b_primary	Zbtb7b	predicted	Promoter of Serpina3 is activated by Zbtb7b. 'T' allele of a SNP in this region predisposes to IUGR and does not respond to Zbtb7b whereas 'G' allele does respond.	22246292
W_Zscan10_01	Zscan10	predicted	Known to regulate ES cells - perhaps regulates TS cells as well?	19740739
L_TCF4_TCF4_01	Tcf4	known	Expression of TCF-3/4 strongly increases invading trophoblasts	16565489
W_Junb_01	JunB	known	JunB knockout mice have placental defects, and giant cells do not establish proper vascular interactions with maternal circulation.	10022836
L_GLI2_01	Gli2	known	Hedgehog signaling plays a role in pathogenesis of placental defects in NSDHL deficiency	17028112
V_NFE2_01	Nfe2	known	Nfe2 regulates syncytium formation, and placental vascularization	21558372 22174410
J_TEAD1	Tead4	known	Tead4 knockout mice do not produce trophoblast stem cells	17913785
B_Nr2f2_secondary	Nr2f2	known	Deleting Nr2f2 from uterus results in increased trophoblast giant cell differentiation and an absence of labyrinth formation	17404209
V_FOXO1_02	Foxo1	known	FoxO1 knockout mice have a swollen allantois that does not fuse with the chorion.	21930913
B_Ascl2_primary	Mash2	known	Mash2 knockout mice do not have spongiotrophoblast cells, and their precurors are absent as well	8090202
V_IK3_01	Ikzf3	known	Ikaros was shown to regulated migration and invasion of HTR-8/SVneo cells (Extravillous trophoblast cell line) and is expressed in human extravillous trophoblasts	16364975
J_RUNX1	Runx1	known	Runx1 is essential for haematopoietic stem cell generation in the placenta	19129762 15737933
B_Gata3_primary	Gata2/3	known	Placentas lacking gata factors accumulate placental lactogen 1 and proliferin and have less angiogenic activity.	9043071
V_PPAR_DR1_Q2	Pparb/d	known	Pparbeta/delta mutation in mouse results in defective trophoblast giant cell layer	16581799
B_Sp100_primary	Sp100	predicted
B_Zfp691_secondary	Zfp691	predicted
G_TIEG_01	Klf6	known	Klfs are highly expressed in placenta. Klf6 knockout has impaired placental development.	11429296 16234353
L_NFATC1_NFATC1_02	Nfatc1	predicted	A drug, cyclosporin, promotees growh and invasiveness of tgcs, and does so through NFAT pathway.	18322274
G_CP2_02	Tfcp2	predicted
J_Stat3	Stat3	known	Phosphorylated Stat3 enhances invasiveness of trophoblast cells	18424427
J_INSM1	Insm1	predicted
W_Sox2_01	Sox2	known	Sox2 is necessary for establishing the trophectoderm lineage.	21103067
B_Elf5_01	Elf5	known	Elf5 is involved in TS cell maintenance	15829518
G_TWIST_01	Twist1	known	Twist regulates N-cadherin-mediated invasion in HTR-8/SVneo cells.	22166980
J_Arnt	Arnt	known	Arnt knockout has reduced labyrinthine and spongiotrophoblast layers, and increased trophoblast giant cells.	11124810
V_ZID_01	Zbtb6	predicted
V_IK_Q5	Ikzf2	known	Ikaros was shown to regulated migration and invasion of HTR-8/SVneo cells (Extravillous trophoblast cell line) and is expressed in human extravillous trophoblasts	16364975
V_LTF_Q6	Ltf	predicted
V_SMAD_Q6_01	Smad1	known	Smad1 knockout mouse has defects in allantois formation and chorioallantoic fusion.	11784053 11566864
B_Ehf_primary	Ehf	known	Knockout mice fail to form labyrinth layer and have failure of chorioallantoic attachment	17502352
V_CACCCBINDINGFACTOR_Q6	Zfp148	predicted	Study suspects the TF is involved in placenta development, but doesn't show it.	18250154
B_Plagl1_primary	Plagl1	predicted	One study has shown that when Zac1 is deleted from the paternal allele, mice have IUGR but placenta appears normal.	17084362
G_HIVEP1_01	Hivep1	known	Hivep1 is unknown in placenta, but motif looks similar to Nfkb, so it might be hitting Rel sites.
W_TFAP2C_01	Tfap2c	known	Tfap2c regulates proliferation and differentiation of trophectodermal cells	11940672 12015300
J_NFATC2	Nfatc2	predicted	A drug, cyclosporin, promotees growh and invasiveness of tgcs, and does so through NFAT pathway.	18322274
G_THR_01	Rxra	known	Rxra knockout mice have defects in labyrinth zone development.	9892670 9356169
G_DMP1_01	Dmtf1	predicted
V_ZNF219_01	Zfp219	predicted
B_Tcfe2a_secondary	Tcf3	known	Expression of TCF-3/4 strongly increases invading trophoblasts	16565489
L_ERG_ERG_01	Erg	known	Erg exon 4 knockout mice have defective labyrinth vasculature	22932696
V_HEB_Q6	Tcf12	predicted	Tcf12 is expressed in placenta cell types, and expression patterns might indicate role in extravillous trophoblast differentiation, but this has not been tested.	15993702
V_P53_03	Trp53	known	Differentiation of TGCs requires downregulation of p53. Knockout mice have decreased spongiotrophoblast layer, and increased trophoblast giant cells.	15013636 17410546
W_Klf1_01	Klf5	known	Klf5 knockout in mouse has defects in trophectoderm layer that prevent normal implantation	18983969
J_Tcfcp2l1	Tcfcp2l1	predicted	Gene is highly expressed in placenta.	11073954
B_Srf_primary	Srf	known	Forced expression of SRF in TS cells induces differentiation into TGCs.	17576768
B_Spdef_primary	Spdef	known	Spdef is an ets factor, and motif looks very similar to other ets factors, which have known roles in placenta development.
J_EBF1	Ebf1	predicted
