# Supplementary material for: Automated Discovery of Tissue-Targeting Enhancers and Transcription Factors from Binding Motif and Gene Function Data
Source: PLOS journal article supplement (doi:10.1371/journal.pcbi.1003449), 2014-01-30
Supplement: S12 (10.1371/journal.pcbi.1003449.s012) [file journal.pcbi.1003449.s012]

| **Mouse Gene** | **Human Gene** | **Expression Quartile: Amnion** | **Expression Quartile: Chorion** | **Expression Quartile: Decidua** | **Expression Quartile: mouse TSCs** |
| --- | --- | --- | --- | --- | --- |
| Zbtb7b | ZBTB7B | 1 | 1 | 1 | 1 |
| Zscan10 | ZSCAN10 | 4 | 4 | 4 | N/A |
| Sp100 | SP100 | 1 | 1 | 1 | N/A |
| Zfp691 | ZNF691 | 2 | 2 | 2 | 1 |
| Nfatc1 | NFATC1 | 2 | 2 | 2 | 4 |
| Tcfcp2 | TFCP2 | 1 | 1 | 1 | N/A |
| Insm1 | INSM1 | 4 | 4 | 4 | 3 |
| Zbtb6 | ZBTB6 | 3 | 3 | 2 | 2 |
| Ltf | LTF | 3 | 3 | 2 | 4 |
| Zfp148 | ZNF148 | 2 | 2 | 2 | 3 |
| Plagl1 | PLAGL1 | 1 | 1 | 1 | N/A |
| Nfatc2 | NFATC2 | 1 | 2 | 2 | 4 |
| Dmtf1 | DMTF1 | 1 | 1 | 1 | 4 |
| Zfp219 | ZNF219 | 1 | 1 | 1 | 1 |
| Tcf12 | TCF12 | 1 | 1 | 1 | 3 |
| Tcfcp2l1 | TFCP2l1 | 3 | 3 | 2 | 2 |
| Ebf1 | EBF1 | 4 | 2 | 2 | N/A |
