# Supplementary material for: Automated Discovery of Tissue-Targeting Enhancers and Transcription Factors from Binding Motif and Gene Function Data
Source: PLOS journal article supplement (doi:10.1371/journal.pcbi.1003449), 2014-01-30
Supplement: S13 (10.1371/journal.pcbi.1003449.s013) [file journal.pcbi.1003449.s013]

## Sheet: placenta TFBS clusters
mm9 Chromosome	Start	End	# TFBS in cluster
chr18	38376416	38376728	12
chr15	78662671	78663016	10
chr7	51842522	51842878	9
chr7	31197682	31197915	9
chr9	44305137	44305397	9
chr11	84780816	84781077	9
chr19	24646297	24646560	9
chr11	95456118	95456444	9
chr3	89190357	89190688	9
chr8	93401219	93401551	9
chr12	86813419	86813772	8
chr13	56736090	56736453	8
chr11	59954387	59954801	8
chr7	19904872	19905029	8
chr2	91853018	91853214	8
chr4	140867589	140867784	8
chr4	133432639	133432835	8
chr8	107917183	107917362	8
chr5	107510181	107510426	8
chr2	113878611	113878864	8
chr8	25383974	25384233	8
chr4	134635756	134636020	8
chr9	20867437	20867702	8
chr6	66999226	66999495	8
chr6	92555279	92555557	8
chr18	76499065	76499343	8
chr11	75469198	75469480	8
chr2	174585943	174586238	8
chr12	87044490	87044786	8
chr18	61214285	61214583	8
chr4	119650496	119650795	8
chr3	21670889	21671191	8
chr11	4163004	4163308	8
chr10	126506810	126507115	8
chr10	79660008	79660314	8
chr11	98159529	98159838	8
chr17	26634281	26634666	8
chr7	137380279	137380589	8
chr16	85800938	85801251	8
chr9	27114855	27115169	8
chr2	153351774	153352091	8
chr11	107409688	107410009	8
chr2	30689046	30689373	8
chr4	128925011	128925338	8
chrX	98527769	98528106	8
chr2	26358368	26358705	8
chr4	151234916	151235255	8
chr18	61520151	61520491	7
chr2	93322316	93322661	7
chr1	135118751	135119098	7
chr8	87509239	87509683	7
chr2	153266567	153266917	7
chr1	91838438	91838846	7
chr17	29587815	29588169	7
chr2	91847202	91847650	7
chr6	108609622	108610074	7
chr19	44798799	44799164	7
chrX	97926300	97926665	7
chr8	87508564	87508932	7
chr7	29166912	29167281	7
chr10	126625349	126625722	7
chr5	123578739	123579112	7
chr12	3808342	3808767	7
chr7	52105674	52105775	7
chr10	126527293	126527413	7
chr18	78434778	78434935	7
chr14	79557468	79557639	7
chr11	98814178	98814364	7
chr8	95134603	95134761	7
chr5	38952520	38952703	7
chr6	119279267	119279453	7
chr19	4155013	4155160	7
chr17	48118791	48118994	7
chr7	88417916	88418119	7
chr18	75529342	75529536	7
chr2	152567288	152567519	7
chr14	8641186	8641412	7
chr15	79054202	79054411	7
chr5	115459255	115459434	7
chr18	39121995	39122239	7
chr16	30069969	30070183	7
chr6	97468552	97468762	7
chr2	119302780	119303010	7
chr2	156547983	156548217	7
chr11	87568840	87569077	7
chr18	49718654	49718885	7
chr15	85483803	85484045	7
chr16	78725759	78725993	7
chr11	3189586	3189837	7
chr14	47155329	47155582	7
chr7	19902097	19902357	7
chr14	29160291	29160552	7
chr2	154252278	154252543	7
chr9	21859168	21859435	7
chr12	82104188	82104456	7
chr4	148190681	148190949	7
chr4	140891182	140891450	7
chr3	87714510	87714779	7
chr12	120478239	120478509	7
chr4	124802036	124802307	7
chr2	173902162	173902543	7
chr17	43532565	43532946	7
chr7	20163351	20163624	7
chrX	45265868	45266141	7
chr7	51591814	51592087	7
chr6	79969303	79969577	7
chr13	100008064	100008493	7
chr17	86584890	86585166	7
chr1	84835155	84835431	7
chr8	86725481	86725759	7
chr2	160051301	160051580	7
chr13	99245621	99245908	7
chr19	45821898	45822185	7
chr11	51671918	51672206	7
chr10	23394906	23395195	7
chr14	26352592	26352882	7
chr1	137640505	137640796	7
chr9	57515681	57515974	7
chr10	127051636	127052023	7
chr14	56443990	56444288	7
chr2	27427910	27428209	7
chr1	188310060	188310361	7
chr17	46200140	46200441	7
chr9	112110205	112110507	7
chr15	102766911	102767214	7
chr1	189834319	189834626	7
chr4	124799845	124800158	7
chr5	75470072	75470385	7
chr9	32532747	32533062	7
chr5	54335957	54336273	7
chr15	79333429	79333748	7
chr17	28314539	28314858	7
chr6	99473525	99473845	7
chr8	118288580	118288900	7
chr7	35977752	35978073	7
chr5	116375769	116376090	7
chr8	123786732	123787056	7
chr15	103169548	103169873	7
chr17	47891287	47891615	7
chr18	35999695	36000023	7
chr5	135026894	135027223	7
chr10	88897494	88897824	7
chr7	151162378	151162710	7
chr6	51010611	51010943	7
chr12	13127311	13127644	7
chr4	133812603	133812936	7
chr7	31844322	31844657	7
chr7	3290131	3290536	7
chr19	59886581	59886986	7
chr17	33649859	33650195	7
chr5	29798686	29799022	7
chr12	82196005	82196342	7
chr6	32437213	32437550	7
chr7	133513072	133513409	7
chr12	80914201	80914607	7
chr19	45181015	45181353	7
chr18	5941411	5941750	7
chr8	108578142	108578549	7
chr15	62012915	62013258	7
chr5	137972505	137972849	7
chrX	33428439	33428783	7
chr19	7043617	7043961	7
chr15	79835372	79835782	7
chr8	73019410	73019755	7
chr14	63985515	63985861	7
chr17	46210757	46211107	6
chr18	76061271	76061621	6
chr7	29166094	29166578	6
chr18	11551346	11551698	6
chr11	78737605	78737958	6
chr1	194680726	194681079	6
chr4	135087788	135088141	6
chr8	28201444	28201899	6
chr3	85078790	85079144	6
chr13	105366093	105366448	6
chrX	152060378	152060734	6
chr15	103367752	103368108	6
chr5	34040773	34041131	6
chr6	72139086	72139445	6
chr2	167630189	167630648	6
chr2	152003037	152003459	6
chr11	19826191	19826555	6
chr7	132749361	132749725	6
chr4	148253046	148253410	6
chr15	102079850	102080216	6
chr14	70951549	70951973	6
chr2	84890186	84890611	6
chr16	21240538	21240963	6
chr5	121038130	121038499	6
chr14	12384430	12384799	6
chr4	136385793	136386162	6
chr9	20779961	20780330	6
chr15	81576355	81576725	6
chr10	60149884	60150254	6
chr1	120286180	120286551	6
chr14	62305319	62305690	6
chr4	139361562	139361933	6
chr5	137551575	137551947	6
chr2	48280852	48281227	6
chr17	44437142	44437517	6
chr9	41743947	41744323	6
chr11	98280850	98281226	6
chr13	54398860	54399236	6
chr10	7675192	7675569	6
chrX	91479769	91480147	6
chr4	123426768	123427146	6
chr19	4208772	4209241	6
chr8	87505997	87506376	6
chr2	167421306	167421685	6
chr9	44298705	44299088	6
chr11	70466838	70467274	6
chr19	7042790	7043174	6
chr11	116509297	116509681	6
chr11	103206021	103206405	6
chr9	20776329	20776713	6
chr14	62778159	62778543	6
chr6	99412153	99412590	6
chr8	91912727	91913164	6
chr4	116985808	116985875	6
chr11	69209535	69209625	6
chr8	75878307	75878396	6
chr11	87562020	87562126	6
chr19	10862896	10862991	6
chr5	76366029	76366123	6
chr15	89000739	89000861	6
chr17	51674027	51674129	6
chr10	19191860	19191967	6
chr3	88427111	88427217	6
chr9	115454951	115455110	6
chr5	135965515	135965618	6
chr19	56711871	56711984	6
chr16	18609309	18609469	6
chr10	110981162	110981287	6
chr2	167653919	167654069	6
chr10	114821866	114822009	6
chr11	51460291	51460444	6
chrX	70713376	70713558	6
chr13	93962259	93962410	6
chr2	137239340	137239472	6
chr15	102087470	102087617	6
chr12	88226005	88226154	6
chr4	140890624	140890796	6
chr11	94854268	94854451	6
chr8	83332144	83332282	6
chr15	58872234	58872371	6
chr14	26538093	26538241	6
chr11	97669445	97669580	6
chr6	86210777	86210939	6
chr11	4157396	4157557	6
chr19	47405246	47405456	6
chr5	91831966	91832130	6
chr7	52961373	52961534	6
chr17	27684321	27684477	6
chr12	85529504	85529638	6
chr3	90058010	90058174	6
chr3	89186141	89186279	6
chr3	5220847	5221014	6
chr9	44303740	44303943	6
chr5	148393870	148394045	6
chr15	61068526	61068724	6
chr18	75526683	75526860	6
chr2	153172297	153172466	6
chr4	94945203	94945414	6
chr3	89222674	89222838	6
chr10	126492890	126493083	6
chr4	133399172	133399376	6
chr16	32130337	32130503	6
chr2	118316029	118316216	6
chr5	148672034	148672200	6
chr1	122517925	122518093	6
chr7	105638903	105639064	6
chr1	164094307	164094495	6
chr7	19606528	19606740	6
chr7	137416764	137416953	6
chr3	87569145	87569309	6
chr17	27650364	27650539	6
chr7	29382790	29382972	6
chr17	24782930	24783133	6
chr2	172375753	172375949	6
chr6	117522392	117522599	6
chr7	78174313	78174495	6
chr1	132900169	132900326	6
chr2	159986788	159986999	6
chr13	102310489	102310718	6
chr11	107407487	107407656	6
chr11	113646993	113647190	6
chr3	88981198	88981385	6
chr17	27698788	27698995	6
chr11	110263709	110263902	6
chr10	128242418	128242594	6
chr2	30564943	30565171	6
chr1	123289552	123289725	6
chr10	128063756	128063931	6
chr14	46149873	46150095	6
chr13	22037140	22037363	6
chr6	127719795	127719989	6
chr5	100654824	100654986	6
chr16	92948835	92949038	6
chr9	40666504	40666717	6
chr15	79897820	79898031	6
chr13	30076691	30076904	6
chr3	9246164	9246361	6
chr16	30024803	30025041	6
chr14	28043905	28044114	6
chr16	17220279	17220485	6
chr16	10429493	10429660	6
chr18	13917224	13917448	6
chr3	121761701	121761924	6
chr5	15671997	15672176	6
chr11	117829920	117830121	6
chr5	143723660	143723884	6
chr9	110665972	110666170	6
chr5	135245106	135245318	6
chr14	8651009	8651244	6
chr7	87352395	87352630	6
chr11	72282763	72282977	6
chr15	6658779	6659023	6
chr7	19513175	19513417	6
chr9	107838865	107839109	6
chr2	32196641	32196820	6
chr9	42328187	42328387	6
chr8	107870620	107870836	6
chr19	5559289	5559516	6
chr15	27443402	27443631	6
chr1	34098089	34098316	6
chr18	77794216	77794419	6
chr19	33162718	33162908	6
chr12	72402578	72402819	6
chr8	86939973	86940171	6
chr15	97835914	97836123	6
chr19	53387458	53387697	6
chr3	88425583	88425821	6
chr16	30034206	30034396	6
chr4	135733585	135733788	6
chrX	49950880	49951055	6
chr16	34935609	34935811	6
chr5	64971340	64971557	6
chr2	33460439	33460683	6
chr10	44168066	44168281	6
chr11	34223823	34224033	6
chr11	117837044	117837263	6
chr15	79840052	79840293	6
chr1	138693016	138693229	6
chr8	129119927	129120149	6
chr4	117508262	117508501	6
chr9	44334637	44334883	6
chr2	28390449	28390693	6
chr14	55482377	55482612	6
chr4	148159444	148159691	6
chr3	88345598	88345821	6
chr14	49726236	49726457	6
chr2	137346200	137346449	6
chr7	17368806	17369028	6
chr19	14300253	14300476	6
chr18	35931810	35932052	6
chr5	75955312	75955539	6
chr4	114381594	114381843	6
chr18	42627012	42627263	6
chr5	116456396	116456648	6
chr8	87504057	87504309	6
chr19	53254923	53255175	6
chr6	31038730	31038983	6
chr2	152754230	152754485	6
chr18	36290191	36290447	6
chr16	24748881	24749138	6
chr2	115685275	115685664	6
chr12	26049907	26050165	6
chr4	132538873	132539131	6
chr1	42691447	42691705	6
chr8	74247034	74247292	6
chr19	46578525	46578784	6
chr18	35020290	35020549	6
chr11	98309489	98309749	6
chr7	78454587	78454847	6
chr4	127666047	127666307	6
chr2	167874655	167874915	6
chr9	32542634	32542895	6
chr7	50692161	50692423	6
chr11	117743216	117743478	6
chr5	118229256	118229518	6
chr11	101788625	101788887	6
chr15	77670389	77670652	6
chr7	16895552	16895815	6
chr5	148449103	148449366	6
chr3	85116087	85116351	6
chr1	173304654	173304918	6
chr1	179188860	179189125	6
chr2	32754528	32754795	6
chr11	69628651	69628918	6
chr18	76020799	76021066	6
chrX	71121272	71121539	6
chr11	98253427	98253695	6
chr6	53519593	53519861	6
chr3	87596710	87596978	6
chr14	16269661	16269929	6
chr13	55265092	55265482	6
chr9	43591232	43591501	6
chr11	85723973	85724242	6
chr12	3834155	3834424	6
chr17	16355659	16355928	6
chr4	134728938	134729207	6
chr5	44945239	44945508	6
chr3	148740134	148740404	6
chr2	29686503	29686773	6
chr3	89200007	89200278	6
chr12	85657792	85658063	6
chr9	114887516	114887788	6
chr4	134588179	134588451	6
chr17	24135391	24135664	6
chr2	163297673	163297947	6
chr12	16516013	16516404	6
chr11	5045687	5045962	6
chr10	20880161	20880436	6
chr16	91962623	91962898	6
chr16	24160774	24161049	6
chr9	72630033	72630309	6
chr18	75979303	75979579	6
chr10	67675115	67675391	6
chr5	123588195	123588472	6
chr11	87962539	87962818	6
chr10	37117221	37117501	6
chr1	122965702	122965982	6
chr7	52636542	52636822	6
chr14	55271700	55271981	6
chr1	134097579	134097861	6
chr11	98322590	98322873	6
chr1	74150712	74150996	6
chr12	110839664	110839948	6
chr7	35957027	35957312	6
chr18	81287843	81288128	6
chr3	9101511	9101797	6
chr19	10307097	10307384	6
chr8	12324832	12325120	6
chr16	97577812	97578206	6
chr19	41337833	41338122	6
chr12	80897418	80897707	6
chr9	21741617	21741907	6
chr17	47679136	47679426	6
chr8	32989201	32989491	6
chrX	45244948	45245392	6
chr3	97628568	97628859	6
chr7	25268104	25268395	6
chr5	3343167	3343459	6
chrX	149793820	149794112	6
chr2	153436859	153437151	6
chr3	88423472	88423765	6
chr18	47460389	47460682	6
chr7	28010174	28010467	6
chr3	108227002	108227297	6
chr13	83499337	83499632	6
chr13	82369392	82369688	6
chr1	14252380	14252676	6
chr10	18684657	18684953	6
chr9	41081278	41081574	6
chr18	36001012	36001308	6
chr2	118722277	118722573	6
chr5	3341156	3341453	6
chr4	138011432	138011730	6
chr3	84265773	84266071	6
chr15	98726254	98726651	6
chr9	45206260	45206657	6
chr4	119406525	119406824	6
chr1	134234479	134234778	6
chr19	44767145	44767444	6
chr19	4332634	4332934	6
chr1	69155065	69155365	6
chr2	32570427	32570727	6
chr2	31205972	31206272	6
chr2	164768060	164768361	6
chr6	115955654	115955955	6
chr11	23723302	23723604	6
chr11	69694542	69694844	6
chr15	62160049	62160351	6
chr11	81846426	81846728	6
chr13	55547060	55547363	6
chr2	9219292	9219595	6
chr4	133308045	133308349	6
chr13	78325741	78326045	6
chr7	71041631	71041935	6
chr3	127201271	127201576	6
chr1	188268682	188268988	6
chr11	112341969	112342275	6
chr3	98221125	98221525	6
chr2	164387796	164388196	6
chr19	5432033	5432340	6
chr11	88255325	88255632	6
chr14	67919934	67920241	6
chr17	56432777	56433085	6
chr14	25995600	25995909	6
chr16	13987081	13987390	6
chr2	127160917	127161226	6
chr15	79854538	79854939	6
chr5	115886748	115887058	6
chr13	113554916	113555226	6
chr2	26357806	26358117	6
chr7	28259560	28259872	6
chr7	52950564	52950876	6
chr13	54986021	54986333	6
chr11	96503866	96504178	6
chr4	148085630	148085942	6
chr16	72405300	72405612	6
chr7	35782008	35782320	6
chr3	142543906	142544219	6
chr1	167647861	167648174	6
chr2	38204046	38204496	6
chr2	38369991	38370305	6
chr1	157350183	157350497	6
chr1	170336606	170336920	6
chr5	140028487	140028890	6
chr11	98794166	98794481	6
chr6	86535123	86535438	6
chr9	32358136	32358451	6
chr14	30043174	30043489	6
chr13	52015929	52016244	6
chr11	110412845	110413161	6
chr17	29601018	29601334	6
chr4	99110292	99110608	6
chr6	72646761	72647077	6
chrX	45695114	45695518	6
chr7	56955234	56955638	6
chr11	118289444	118289761	6
chr6	84263797	84264114	6
chr7	19668839	19669156	6
chr11	57678286	57678604	6
chr4	136716340	136716658	6
chr3	87717515	87717920	6
chr11	117784515	117784834	6
chr11	57679766	57680085	6
chr5	23960151	23960470	6
chr12	78062366	78062685	6
chr7	151923677	151923997	6
chr7	19512277	19512597	6
chr6	90714894	90715214	6
chr2	13715394	13715715	6
chr16	93963361	93963682	6
chr11	52127504	52127825	6
chr9	68503211	68503533	6
chr11	98810773	98811096	6
chr19	5448705	5449028	6
chr15	77640511	77640834	6
chr4	132934081	132934404	6
chr13	63629754	63630077	6
chr15	79989931	79990254	6
chr2	84971500	84971907	6
chr5	34031994	34032318	6
chr13	54867169	54867493	6
chr17	47933110	47933434	6
chr5	15440006	15440330	6
chr12	25784665	25784990	6
chr15	102796123	102796448	6
chr6	52066263	52066671	6
chr11	97559880	97560288	6
chr10	37204576	37204902	6
chr2	104947452	104947779	6
chr7	51925778	51926105	6
chr11	18777317	18777644	6
chr7	56890172	56890499	6
chr5	74173971	74174380	6
chr4	57968375	57968703	6
chr2	35127518	35127846	6
chr4	147279051	147279380	6
chr14	112075113	112075442	6
chr14	122678720	122679049	6
chr7	29157683	29158012	6
chr4	140885325	140885655	6
chr8	123906629	123906959	6
chr11	98801968	98802298	6
chr5	125537296	125537626	6
chr19	7250497	7250828	6
chr7	26566607	26566938	6
chr8	25567928	25568259	6
chr11	102180939	102181270	6
chr2	33651881	33652213	6
chr7	112630765	112631097	6
chr15	73562487	73562820	6
chr6	114919834	114920167	6
chr17	23876331	23876743	6
chr3	57380261	57380595	6
chr2	173239282	173239616	6
chr11	44478905	44479240	6
chr7	16986727	16987062	6
chr5	30903743	30904079	6
chr10	17441226	17441564	6
chr15	100701757	100702095	6
chr14	79125750	79126088	6
chr11	101677033	101677371	6
chr7	26492679	26493017	6
chrX	11383731	11384069	6
chr1	163945465	163945803	6
chr11	19879253	19879592	6
chr11	103890525	103890864	6
chr17	34791023	34791363	6
chr14	80612371	80612711	6
chr2	174109442	174109783	6
chr16	18616931	18617347	6
chr18	35021524	35021940	6
chr4	133215749	133216092	6
chr4	138709930	138710274	6
chr10	92881436	92881780	6
chr16	24629418	24629762	6
chr4	134710024	134710369	6
chr14	55194356	55194702	6
chr11	66381011	66381357	6
chr1	167774798	167775293	6
chr6	41504676	41505023	6
chr7	19597283	19597804	6
chr11	95048097	95048445	6
chr2	167556672	167557020	6
chr6	127189790	127190210	6
chr8	119781823	119782172	6
chr13	48254623	48254973	6
chr14	70432071	70432421	6
chr1	194625768	194626118	6
chr11	97672352	97672703	6
chr4	41043277	41043628	6
chr10	36970800	36971222	6
chr3	146042868	146043220	6
chr15	102830493	102830845	6
chr10	79758683	79759035	6
chr15	97655579	97655932	6
chr7	105652898	105653251	6
chr5	119583428	119583782	6
chr1	180458263	180458618	5
chr4	35103508	35103863	5
chr4	153845509	153845864	5
chr2	68699911	68700266	5
chr16	4880561	4880916	5
chr11	23974648	23975115	5
chr6	84060701	84061057	5
chr1	193040087	193040443	5
chr8	87262013	87262369	5
chr1	196546416	196546773	5
chr5	76097671	76098028	5
chr5	115985695	115986053	5
chr3	89124344	89124702	5
chr6	142681250	142681609	5
chr12	87051639	87051998	5
chr19	7342297	7342724	5
chr2	167764951	167765311	5
chr2	93459423	93459783	5
chr14	70474455	70474815	5
chr10	67694319	67694679	5
chr18	11052006	11052367	5
chrX	50405732	50406093	5
chr9	32352017	32352445	5
chr4	138020541	138020903	5
chr15	75718853	75719215	5
chr2	32770408	32770770	5
chr1	75345655	75346018	5
chr11	43825298	43825661	5
chr13	27025730	27026093	5
chr12	84807402	84807765	5
chr6	85110560	85110923	5
chr4	136767916	136768345	5
chr11	89161473	89161837	5
chr8	109653277	109653641	5
chr14	70447119	70447484	5
chr15	79880555	79880920	5
chr18	36228251	36228616	5
chr15	56210177	56210542	5
chr6	119057355	119057720	5
chr2	173091929	173092294	5
chr8	107993805	107994171	5
chr16	36642645	36643011	5
chr19	44815908	44816339	5
chr8	129356471	129356838	5
chr1	191858247	191858614	5
chr5	138199246	138199678	5
chr5	115418958	115419390	5
chr10	40219758	40220190	5
chr8	113278528	113278896	5
chr5	119741814	119742182	5
chrX	11657927	11658295	5
chr1	133096760	133097128	5
chr18	13617326	13617695	5
chr2	130467992	130468361	5
chr10	126967796	126968166	5
chr11	84376654	84377024	5
chr18	38791112	38791482	5
chr11	103639529	103639899	5
chr3	97031789	97032159	5
chr11	100146846	100147216	5
chr2	31910813	31911247	5
chrX	99446078	99446450	5
chr5	115590852	115591287	5
chr2	173177400	173177773	5
chr8	74854933	74855306	5
chr17	28284147	28284520	5
chr4	132530627	132531000	5
chr11	74281743	74282116	5
chr15	78375180	78375616	5
chr5	141085414	141085788	5
chr6	91940003	91940378	5
chr5	120875741	120876116	5
chr8	37671447	37671884	5
chr1	74996152	74996589	5
chrX	49412998	49413435	5
chr15	85328374	85328811	5
chr5	112656302	112656678	5
chr4	128949474	128949850	5
chr15	3349280	3349656	5
chrX	98614355	98614732	5
chr9	21608301	21608678	5
chr9	41543720	41544097	5
chr2	38561939	38562316	5
chr5	140386069	140386447	5
chr8	95205081	95205459	5
chr5	140074691	140075069	5
chr2	153262831	153263209	5
chr10	67972051	67972429	5
chr5	141087862	141088241	5
chr5	119508401	119508780	5
chr8	123651070	123651450	5
chr5	135373382	135373762	5
chr5	111938058	111938438	5
chr4	130219915	130220295	5
chr4	137641410	137641791	5
chr10	127735140	127735521	5
chr15	102790799	102791180	5
chr4	120324820	120325201	5
chr9	63942145	63942526	5
chr5	148533080	148533521	5
chr10	120053772	120054213	5
chr8	111988703	111989085	5
chr18	61825258	61825641	5
chr11	3269069	3269452	5
chr5	138201162	138201545	5
chr1	16608786	16609170	5
chr6	136491863	136492247	5
chr5	120328436	120328821	5
chr10	127057135	127057520	5
chr10	43868393	43868778	5
chr3	26607818	26608203	5
chr13	29270147	29270591	5
chr2	164388970	164389356	5
chr11	118917030	118917416	5
chr15	50078404	50078849	5
chr7	20356427	20356814	5
chr8	3600205	3600592	5
chr7	56670635	56671022	5
chr19	55637749	55638136	5
chr4	155155040	155155428	5
chr7	133602590	133602978	5
chr11	74385943	74386332	5
chr17	84443576	84443965	5
chr11	98628487	98628876	5
chr19	10299388	10299777	5
chr11	85709804	85710193	5
chr4	62294991	62295380	5
chrX	33429547	33429936	5
chr9	21600842	21601289	5
chr4	48060524	48060914	5
chr1	93816654	93817044	5
chr12	87378247	87378637	5
chr13	117814392	117814782	5
chr13	42621303	42621751	5
chrX	7248466	7248858	5
chr17	48168513	48168905	5
chr17	48024220	48024707	5
chr12	76697271	76697720	5
chr12	78242613	78243006	5
chr11	57147477	57147870	5
chr11	102106286	102106680	5
chr15	102086072	102086466	5
chr15	84817101	84817495	5
chr5	143582253	143582647	5
chr7	25154865	25155260	5
chr11	4998446	4998841	5
chr18	38114717	38115168	5
chrX	138914066	138914462	5
chr2	151873962	151874358	5
chr1	74588981	74589378	5
chr8	110826454	110826851	5
chr17	34162387	34162785	5
chr2	147010342	147010740	5
chr7	122810189	122810587	5
chr2	71379145	71379598	5
chr7	35893437	35893836	5
chr18	59334508	59334907	5
chr4	84279185	84279584	5
chr10	61608766	61609165	5
chr9	65518956	65519356	5
chr18	38009159	38009559	5
chr8	91907439	91907931	5
chr14	86598952	86598987	5
chr2	92011555	92011598	5
chr11	35082744	35082790	5
chr7	56221826	56221877	5
chr7	52184569	52184633	5
chr2	167940596	167940673	5
chr18	9730202	9730272	5
chr7	54387464	54387536	5
chr4	44724817	44724886	5
chr3	67386600	67386679	5
chr8	112302359	112302428	5
chr17	87858810	87858876	5
chr18	60788374	60788456	5
chr4	65138323	65138398	5
chr4	120529395	120529471	5
chr11	102258338	102258412	5
chr9	110653417	110653511	5
chr17	67653294	67653368	5
chr4	136783661	136783740	5
chr7	56697523	56697594	5
chr1	14746147	14746246	5
chr5	136363670	136363761	5
chr1	52388380	52388469	5
chr10	80398515	80398618	5
chr10	92532221	92532312	5
chr12	25393509	25393618	5
chr11	106992439	106992544	5
chr4	130471669	130471778	5
chr19	41970649	41970759	5
chr11	69159980	69160095	5
chr11	96577473	96577574	5
chr12	78340408	78340512	5
chr16	93388069	93388197	5
chrX	45637802	45637919	5
chr11	52096050	52096180	5
chr7	122768848	122768958	5
chr11	35096596	35096711	5
chr10	70577308	70577423	5
chr18	60882317	60882438	5
chr2	26381258	26381383	5
chr10	85736176	85736275	5
chr6	86473929	86474053	5
chr1	155038606	155038724	5
chrX	11865068	11865162	5
chr3	121163456	121163566	5
chr3	107949051	107949158	5
chr2	35953861	35953995	5
chr3	33919155	33919264	5
chr15	100907146	100907248	5
chr12	83300970	83301110	5
chr14	47973865	47973977	5
chr1	195016954	195017058	5
chr1	130352843	130352960	5
chr4	140852068	140852194	5
chr11	44506241	44506385	5
chr3	21816633	21816777	5
chr15	88670657	88670792	5
chr18	31546998	31547111	5
chr4	141154350	141154468	5
chr3	148295532	148295642	5
chr19	9019478	9019590	5
chr17	56249230	56249355	5
chr12	4824257	4824382	5
chr6	113699716	113699825	5
chr2	84709926	84710031	5
chr18	36233670	36233807	5
chr4	135728074	135728223	5
chr11	80286125	80286223	5
chr17	45729870	45729974	5
chr17	29614518	29614671	5
chr19	47402248	47402362	5
chr2	155576787	155576911	5
chr5	75973277	75973404	5
chr5	121138531	121138650	5
chr5	138190759	138190907	5
chr10	67568094	67568209	5
chr1	62795126	62795268	5
chr11	51454919	51455030	5
chr14	122933706	122933835	5
chr1	16105447	16105576	5
chr4	3574155	3574275	5
chr16	87559021	87559151	5
chr2	164895999	164896153	5
chr17	51965959	51966085	5
chr2	28395579	28395697	5
chr9	41635601	41635723	5
chr17	45397443	45397558	5
chr1	19941476	19941598	5
chr8	116500793	116500949	5
chr6	88102206	88102326	5
chr4	32422838	32423000	5
chr2	25422090	25422219	5
chr19	45368226	45368373	5
chr3	95463492	95463622	5
chr3	100816366	100816492	5
chrX	40783466	40783618	5
chr12	110752663	110752775	5
chr15	84526655	84526801	5
chr9	40266816	40266944	5
chr4	135109443	135109568	5
chr17	26497147	26497311	5
chr11	44619210	44619344	5
chr3	148995238	148995371	5
chr9	63816593	63816735	5
chr17	26602113	26602259	5
chr13	16809264	16809398	5
chr8	118620638	118620796	5
chr5	104578425	104578584	5
chr6	84441226	84441377	5
chr12	111426436	111426600	5
chr9	20781241	20781383	5
chr10	20871172	20871307	5
chr1	61366436	61366565	5
chr17	29574397	29574560	5
chrX	49517485	49517641	5
chr4	59400892	59401029	5
chr11	98275590	98275731	5
chr4	155570344	155570512	5
chr3	97913954	97914088	5
chr17	49971190	49971336	5
chr11	78917035	78917224	5
chr2	37637073	37637216	5
chr1	162964603	162964771	5
chr2	35477287	35477420	5
chr11	89409271	89409414	5
chr18	60779514	60779668	5
chr7	133924190	133924330	5
chr6	87351628	87351765	5
chr10	117856274	117856427	5
chr14	17197164	17197294	5
chr15	80469610	80469759	5
chr19	53379941	53380091	5
chr2	158525778	158525959	5
chr9	63525483	63525659	5
chr15	79781116	79781302	5
chr14	80892844	80893022	5
chr9	65306790	65306932	5
chr4	124341415	124341568	5
chr1	80753680	80753824	5
chr7	79814684	79814822	5
chr8	86271752	86271923	5
chr13	46822514	46822657	5
chr8	37185698	37185843	5
chr14	17495701	17495851	5
chr7	116311216	116311340	5
chr11	100517916	100518056	5
chr17	46047076	46047237	5
chr7	19995169	19995319	5
chr8	123210166	123210321	5
chr15	12161876	12162016	5
chr9	110784508	110784659	5
chr19	46120401	46120578	5
chr18	33631240	33631383	5
chr4	119833755	119833901	5
chr11	32261886	32262078	5
chr5	117272245	117272417	5
chr9	45494311	45494487	5
chr3	110874237	110874388	5
chr14	25665113	25665249	5
chr11	117353358	117353541	5
chr2	75670005	75670192	5
chr2	166937860	166938023	5
chr7	80686695	80686870	5
chr15	90919689	90919870	5
chrX	141913718	141913849	5
chr7	37558958	37559108	5
chr16	32511135	32511278	5
chr14	70926874	70927049	5
chr7	3304510	3304678	5
chr4	23910458	23910605	5
chr5	115993951	115994094	5
chr14	32482513	32482728	5
chr2	92458276	92458436	5
chr15	98864057	98864217	5
chr11	101091383	101091565	5
chr11	77653525	77653665	5
chr3	88317080	88317247	5
chr10	125427981	125428144	5
chrX	56645708	56645846	5
chr16	25803062	25803237	5
chr8	86726469	86726680	5
chr14	41820951	41821111	5
chr3	87788113	87788278	5
chr6	91702989	91703135	5
chrX	136812150	136812333	5
chr11	102157329	102157479	5
chr9	120600072	120600247	5
chr6	48971039	48971236	5
chr1	176902234	176902385	5
chr17	46023755	46023917	5
chr6	127718483	127718654	5
chr2	127161712	127161894	5
chr18	69736352	69736539	5
chr7	134339520	134339697	5
chr16	20620841	20621006	5
chr9	63914603	63914784	5
chr18	62334295	62334504	5
chr3	87355295	87355439	5
chr4	129219938	129220132	5
chr4	118682500	118682684	5
chr14	28064681	28064850	5
chr7	25692163	25692318	5
chr8	122695538	122695717	5
chr6	30574779	30574955	5
chr9	110547840	110548032	5
chr10	84217842	84218004	5
chr3	49573161	49573308	5
chr15	35195773	35195920	5
chr17	47968098	47968255	5
chr5	116633267	116633409	5
chr11	24002549	24002725	5
chr16	5136152	5136337	5
chr15	97832678	97832815	5
chr10	79568312	79568484	5
chr19	59967457	59967653	5
chr5	135239287	135239455	5
chr7	103622619	103622813	5
chr2	162486257	162486420	5
chr2	168379053	168379234	5
chrX	151650990	151651137	5
chr7	16534115	16534289	5
chr15	99501823	99502007	5
chr4	86053876	86054053	5
chr10	98834861	98835028	5
chr11	94735467	94735644	5
chrX	18815308	18815508	5
chr2	136812919	136813077	5
chr11	79153731	79153897	5
chr8	117757993	117758180	5
chr9	69388169	69388363	5
chr4	133160219	133160375	5
chr7	134628263	134628465	5
chr8	35625414	35625609	5
chr1	89652458	89652623	5
chr11	5755963	5756172	5
chr17	32420408	32420606	5
chr6	31654869	31655032	5
chr11	109030486	109030670	5
chr14	26559786	26560004	5
chr10	127186274	127186466	5
chr7	52956244	52956456	5
chr15	77631067	77631235	5
chr8	86671317	86671523	5
chr5	125561633	125561824	5
chr7	142261590	142261770	5
chr5	137780145	137780307	5
chr3	89873535	89873692	5
chr2	92446271	92446501	5
chr3	14863277	14863457	5
chr6	39218984	39219168	5
chr7	16540625	16540841	5
chr8	86433314	86433498	5
chr13	60092289	60092510	5
chr5	120135398	120135597	5
chr14	120556470	120556650	5
chr7	90013932	90014109	5
chr8	90292727	90292905	5
chr5	75173459	75173640	5
chr4	65157555	65157725	5
chr10	61404493	61404673	5
chr5	137789949	137790118	5
chr16	85172014	85172193	5
chr7	53178278	53178494	5
chr7	133905181	133905416	5
chr5	137972139	137972331	5
chr12	96811956	96812130	5
chr9	20617372	20617589	5
chr5	112032205	112032370	5
chr18	76056204	76056379	5
chrX	45668269	45668476	5
chr5	100724356	100724538	5
chr4	154460423	154460653	5
chr11	33062220	33062388	5
chr5	90311235	90311449	5
chr13	40833060	40833231	5
chr7	31421423	31421634	5
chr16	15114689	15114889	5
chr8	74878165	74878377	5
chr17	36117231	36117421	5
chr11	98206603	98206774	5
chr11	100800048	100800233	5
chr6	52168924	52169113	5
chr10	87356072	87356265	5
chrX	165709186	165709392	5
chr15	85383950	85384146	5
chr11	20933954	20934126	5
chr2	28381268	28381434	5
chr15	102641820	102642036	5
chr8	72408742	72408946	5
chr1	186386882	186387045	5
chr18	36009099	36009314	5
chr8	123383955	123384132	5
chr6	72185603	72185804	5
chr9	30440026	30440212	5
chr17	48115466	48115660	5
chr11	117793669	117793847	5
chr17	56564474	56564678	5
chr8	109395822	109395990	5
chr13	119504556	119504794	5
chr8	8819250	8819446	5
chr1	120807332	120807552	5
chr17	27173568	27173744	5
chr10	61341307	61341499	5
chr17	27107842	27108070	5
chr3	28680032	28680227	5
chr13	103832145	103832304	5
chr10	27224593	27224763	5
chr7	31572663	31572864	5
chr11	100490504	100490702	5
chr18	69505624	69505807	5
chrX	7442523	7442743	5
chr14	34141528	34141684	5
chrX	96855039	96855241	5
chr14	52605498	52605740	5
chr16	84621732	84621965	5
chrX	55373395	55373577	5
chr8	26181145	26181327	5
chrX	68302577	68302752	5
chr9	68719955	68720196	5
chr5	75439975	75440178	5
chr16	18683581	18683776	5
chr5	32332564	32332758	5
chr10	58904576	58904787	5
chr6	108520998	108521220	5
chr18	5591691	5591887	5
chr10	59570274	59570470	5
chr7	30090126	30090358	5
chr17	63133286	63133479	5
chr11	102889590	102889799	5
chr1	106666015	106666184	5
chr7	20011038	20011230	5
chr10	85788049	85788249	5
chr10	126726262	126726478	5
chr10	127918879	127919089	5
chr8	123720889	123721084	5
chr7	20402780	20402990	5
chr15	78788400	78788622	5
chr2	67403442	67403646	5
chr7	35976378	35976560	5
chr15	78616489	78616690	5
chr11	68725081	68725296	5
chr2	91805782	91806012	5
chr10	119869201	119869374	5
chr9	122004820	122005026	5
chr10	60870714	60870915	5
chr9	58164777	58164994	5
chr14	70493805	70494015	5
chr15	103133163	103133401	5
chr11	95405077	95405274	5
chr12	12948146	12948327	5
chr5	133632340	133632557	5
chr18	38332015	38332232	5
chr11	116509782	116510026	5
chr7	118112038	118112274	5
chr7	80388760	80388969	5
chr7	17545317	17545484	5
chr6	127129071	127129293	5
chr11	31743977	31744187	5
chr17	49072467	49072698	5
chr18	38158046	38158281	5
chr7	31147866	31148116	5
chr4	128534741	128534927	5
chr13	28646823	28647051	5
chr9	14446756	14446969	5
chr8	8656140	8656331	5
chr11	115569300	115569530	5
chr10	84565765	84565952	5
chr3	89132638	89132833	5
chr3	121304965	121305190	5
chr2	102223751	102223978	5
chr10	125398880	125399067	5
chrX	12339137	12339325	5
chr7	134621791	134622009	5
chr15	37363162	37363371	5
chr4	41633147	41633348	5
chr17	29573931	29574127	5
chr9	68804856	68805048	5
chr16	55838790	55839022	5
chr12	56425928	56426122	5
chr6	55087988	55088164	5
chr17	27698009	27698225	5
chr10	83006950	83007168	5
chr11	57886355	57886552	5
chr6	90736974	90737158	5
chrX	7204203	7204451	5
chr8	7135414	7135662	5
chr6	131337738	131337966	5
chr1	75464172	75464383	5
chr3	89192059	89192255	5
chr7	16929991	16930206	5
chr11	117750156	117750378	5
chr9	106106221	106106450	5
chr16	23981939	23982147	5
chr11	98827196	98827373	5
chr7	152486533	152486714	5
chr14	21749946	21750167	5
chr17	84551890	84552110	5
chr10	98146956	98147153	5
chr6	124915123	124915302	5
chr2	27744292	27744494	5
chr2	72077232	72077477	5
chr7	19876648	19876898	5
chr2	33459699	33459926	5
chrX	11730434	11730681	5
chr1	74071703	74071932	5
chr19	55940360	55940598	5
chr2	84458186	84458397	5
chr7	120068422	120068639	5
chr9	44294555	44294755	5
chr7	20412276	20412510	5
chr11	53871067	53871264	5
chr10	92760662	92760843	5
chr8	122750919	122751166	5
chr5	104189896	104190095	5
chr11	4137586	4137817	5
chr4	132598028	132598254	5
chr1	164406789	164406977	5
chr3	130815390	130815618	5
chr4	117587718	117587949	5
chrX	45609896	45610102	5
chr1	173180188	173180425	5
chr15	101057435	101057670	5
chr11	115674953	115675171	5
chr14	26016388	26016597	5
chr2	167515923	167516163	5
chr8	94532764	94532977	5
chr17	48035368	48035585	5
chr14	56447691	56447927	5
chr8	111286377	111286603	5
chr11	98803486	98803678	5
chr4	124347672	124347885	5
chr9	57983672	57983884	5
chr6	52211087	52211301	5
chr12	87087283	87087474	5
chr14	70437708	70437922	5
chr17	28408792	28409025	5
chr5	35755453	35755687	5
chr5	32423486	32423717	5
chr8	87223825	87224032	5
chr19	5097794	5097983	5
chr8	87506474	87506708	5
chr8	72683978	72684204	5
chr11	101949177	101949409	5
chr16	33916559	33916804	5
chr14	106131469	106131687	5
chr16	14292413	14292618	5
chr9	107597870	107598085	5
chrX	70881687	70881909	5
chr15	100836342	100836553	5
chr11	94331183	94331416	5
chr18	36024737	36024973	5
chrX	117040608	117040800	5
chr7	20065222	20065423	5
chr4	99382065	99382301	5
chr11	69613544	69613759	5
chr19	36204264	36204504	5
chr9	14169880	14170125	5
chr18	61190371	61190614	5
chr11	17298962	17299174	5
chr17	57403694	57403924	5
chr2	130463970	130464158	5
chr11	84496186	84496381	5
chr7	103359949	103360141	5
chr7	106500657	106500887	5
chr2	48804792	48805019	5
chr11	20910929	20911139	5
chr8	94951736	94951986	5
chr14	56472593	56472825	5
chr9	65675441	65675640	5
chr18	10324875	10325114	5
chr5	130861158	130861390	5
chr8	27954607	27954856	5
chr1	174245399	174245584	5
chr14	70575683	70575896	5
chr3	141460723	141460958	5
chr15	98763841	98764056	5
chr2	168780339	168780568	5
chr5	4731816	4732046	5
chr2	126440413	126440638	5
chr4	107243445	107243670	5
chr6	84516239	84516457	5
chr8	97958797	97959033	5
chrX	130960483	130960714	5
chr9	65417649	65417890	5
chr19	32461213	32461419	5
chr15	99548285	99548468	5
chr4	153798950	153799196	5
chr6	110595311	110595550	5
chr11	98609712	98609958	5
chr19	53609776	53610024	5
chr5	119320778	119321027	5
chr12	87729572	87729774	5
chr8	129362955	129363185	5
chr4	136659654	136659875	5
chr10	39249449	39249660	5
chr7	4744322	4744529	5
chr2	167876020	167876257	5
chr18	78495255	78495504	5
chr6	83187055	83187287	5
chr8	36438550	36438754	5
chr16	95950431	95950681	5
chr17	28177621	28177840	5
chr7	25914774	25915002	5
chr7	87189185	87189412	5
chr1	17086996	17087224	5
chr14	14900757	14900976	5
chr10	59829904	59830118	5
chr19	36647292	36647503	5
chr4	132593532	132593753	5
chr5	120750439	120750655	5
chr4	129665585	129665826	5
chr15	51418629	51418824	5
chr7	20063233	20063477	5
chr13	45648363	45648579	5
chr7	25736278	25736525	5
chr9	44543330	44543578	5
chr2	63540553	63540781	5
chrX	16911204	16911430	5
chr1	59528041	59528271	5
chr9	56716177	56716397	5
chr9	44135810	44136033	5
chr2	31210222	31210464	5
chr9	107471650	107471867	5
chr17	47027217	47027463	5
chr13	103887293	103887531	5
chr7	122594515	122594750	5
chr11	81137645	81137878	5
chr6	124869932	124870179	5
chr14	55317149	55317365	5
chr4	102887808	102888040	5
chr9	116032301	116032541	5
chr14	46947160	46947387	5
chr17	86028069	86028304	5
chr18	4352964	4353210	5
chr19	4294460	4294694	5
chr1	23181387	23181613	5
chr9	49677364	49677599	5
chr11	95868355	95868595	5
chrX	70232156	70232373	5
chr13	64208977	64209206	5
chr18	72501435	72501630	5
chr16	7081212	7081455	5
chr12	21379478	21379711	5
chr5	53605199	53605407	5
chr1	146120277	146120523	5
chr9	110629684	110629913	5
chr4	62950310	62950528	5
chr1	91826557	91826766	5
chr11	33036191	33036428	5
chr9	110783327	110783558	5
chr18	47745110	47745356	5
chr17	5081318	5081549	5
chr10	80608615	80608841	5
chr17	56442517	56442759	5
chr4	120383162	120383378	5
chr5	64780377	64780605	5
chr3	57379293	57379516	5
chr8	95379580	95379812	5
chr3	87751868	87752104	5
chr10	67745470	67745706	5
chr5	113567314	113567552	5
chr14	99766285	99766521	5
chr11	23981038	23981264	5
chr11	84376298	84376526	5
chr2	92672255	92672499	5
chr6	31515042	31515280	5
chr2	109535039	109535285	5
chr7	38120391	38120619	5
chr8	109416437	109416669	5
chr10	126409210	126409456	5
chr3	30312016	30312250	5
chr16	29774415	29774649	5
chr4	44683901	44684135	5
chr15	98521678	98521928	5
chr8	119846404	119846649	5
chr7	149669229	149669450	5
chr2	84615037	84615279	5
chr8	90467579	90467819	5
chr2	35960341	35960579	5
chr8	111250553	111250772	5
chr8	80944091	80944334	5
chr7	26061031	26061275	5
chr8	112686218	112686454	5
chr11	18779306	18779520	5
chr11	100000739	100000975	5
chr9	24726622	24726871	5
chr3	87953821	87954043	5
chr4	54483896	54484141	5
chr17	87167966	87168216	5
chr14	17408242	17408453	5
chr6	6542793	6543024	5
chr4	124303823	124304055	5
chr7	25733997	25734241	5
chr18	69819870	69820117	5
chr15	38403336	38403581	5
chr2	152052847	152053093	5
chr4	151384328	151384573	5
chr6	55509726	55509953	5
chr2	76684290	76684528	5
chr11	103626699	103626949	5
chr5	116073581	116073812	5
chr1	192488672	192488918	5
chr6	88379466	88379689	5
chr8	26648182	26648431	5
chr11	97380721	97380956	5
chr11	98804693	98804937	5
chr6	22166636	22166875	5
chr9	63926160	63926392	5
chr12	84260308	84260540	5
chr1	69514434	69514680	5
chr4	101028819	101029065	5
chr10	122634332	122634573	5
chr1	51878860	51879108	5
chr17	29626466	29626717	5
chr19	32830699	32830950	5
chr17	23813642	23813893	5
chr19	43621417	43621668	5
chr13	43217883	43218135	5
chr4	13670014	13670266	5
chr7	25874215	25874467	5
chr4	62756608	62756861	5
chr7	20050234	20050487	5
chr2	25988355	25988608	5
chr17	86959154	86959407	5
chr7	131126961	131127362	5
chr1	133175365	133175619	5
chr18	38761983	38762237	5
chr11	89782522	89782776	5
chr11	97684299	97684553	5
chr12	109173349	109173603	5
chr5	137502099	137502354	5
chr11	64448191	64448446	5
chr4	136307030	136307285	5
chr10	126514432	126514687	5
chr2	169902524	169902779	5
chr10	116018238	116018493	5
chr2	157250268	157250524	5
chr13	117101265	117101521	5
chr11	24241665	24241921	5
chr3	90069572	90069828	5
chrX	99122985	99123241	5
chr3	53403197	53403453	5
chr6	145288586	145288842	5
chr15	103136088	103136344	5
chr11	47802523	47802779	5
chr5	119437787	119438043	5
chr3	58181126	58181382	5
chr2	167389278	167389535	5
chr1	19212266	19212523	5
chr5	107539806	107540063	5
chr5	121666212	121666469	5
chrX	50564668	50564925	5
chr7	71110040	71110297	5
chr17	32298923	32299181	5
chr17	34743125	34743383	5
chr15	100890341	100890599	5
chr3	30407992	30408250	5
chr13	31893086	31893345	5
chrX	49727432	49727691	5
chr4	106520534	106520793	5
chr8	126418738	126418997	5
chr5	120112750	120113009	5
chr17	27079041	27079300	5
chr16	22161466	22161725	5
chr2	28771998	28772257	5
chr7	37965751	37966010	5
chr19	44769718	44769978	5
chr6	52223950	52224210	5
chr11	102156950	102157210	5
chr3	115392336	115392596	5
chr2	32208222	32208482	5
chr10	128024956	128025216	5
chr9	43553254	43553515	5
chr2	20212927	20213188	5
chr5	124874385	124874646	5
chr5	120273101	120273362	5
chr5	133169396	133169658	5
chr19	4214128	4214390	5
chr17	33916216	33916478	5
chr5	115777601	115777863	5
chr11	112026982	112027244	5
chr8	123824978	123825240	5
chr4	148160195	148160458	5
chr7	38627014	38627277	5
chr11	19252984	19253247	5
chr7	140316046	140316309	5
chr7	17053600	17053863	5
chr8	91527433	91527696	5
chr12	81361853	81362116	5
chr6	99558224	99558487	5
chr4	115640381	115640645	5
chr3	35250807	35251071	5
chr11	98244318	98244582	5
chr15	77629234	77629498	5
chr7	52307589	52307853	5
chr12	57817438	57817702	5
chr13	16102817	16103081	5
chr2	65014570	65014834	5
chr9	59506158	59506422	5
chr4	140883031	140883296	5
chr7	78374682	78374947	5
chr10	43389255	43389520	5
chr16	93465504	93465770	5
chr13	114981358	114981624	5
chr7	4795594	4795860	5
chr2	29090236	29090502	5
chr8	84336263	84336529	5
chr1	121400858	121401124	5
chr2	24377173	24377439	5
chr4	125827559	125827826	5
chr17	49861733	49862000	5
chr5	111483961	111484228	5
chr8	87338885	87339152	5
chr1	21060728	21060995	5
chr3	89198541	89198808	5
chr10	79615564	79615831	5
chr15	61956697	61956964	5
chr9	36948482	36948749	5
chr3	145627273	145627675	5
chr3	89019619	89020021	5
chrX	71490068	71490336	5
chr2	153761243	153761511	5
chr9	69465062	69465331	5
chr10	25427921	25428190	5
chr11	88298939	88299208	5
chr11	75464034	75464303	5
chr14	48995947	48996216	5
chr15	80432229	80432498	5
chr12	5215238	5215507	5
chr1	140505684	140505953	5
chr17	29932054	29932510	5
chr17	27862759	27863029	5
chr10	19117811	19118081	5
chr2	25122697	25122967	5
chr2	13714660	13714930	5
chr1	4643896	4644166	5
chr6	31119348	31119618	5
chr2	166483226	166483496	5
chr1	56206879	56207149	5
chr14	20917536	20917806	5
chr15	66632183	66632454	5
chr4	106538459	106538730	5
chr7	134912655	134912926	5
chrX	98625257	98625528	5
chr18	75683376	75683647	5
chr18	38843471	38843742	5
chr12	56565944	56566215	5
chr17	26621997	26622268	5
chr6	129484057	129484328	5
chr12	82247684	82247955	5
chr4	138832297	138832569	5
chr8	123060292	123060564	5
chr12	88331589	88331861	5
chr7	124606138	124606410	5
chr11	95077300	95077572	5
chr7	53151375	53151647	5
chr4	62291033	62291306	5
chr17	35834734	35835007	5
chr2	29837697	29837970	5
chr12	58184492	58184765	5
chr8	86186385	86186658	5
chr1	74998257	74998531	5
chr12	109503925	109504199	5
chr2	159823239	159823642	5
chr17	45821793	45822196	5
chr10	60277540	60277815	5
chr12	86087358	86087633	5
chr8	87314240	87314515	5
chr5	120145959	120146234	5
chr2	93482286	93482561	5
chr3	37475446	37475721	5
chr3	101040903	101041179	5
chr11	35733826	35734102	5
chr15	97775984	97776260	5
chr2	29933982	29934258	5
chr17	29629057	29629333	5
chr7	19511791	19512067	5
chr15	78402027	78402303	5
chr11	72779281	72779557	5
chr13	55611843	55612119	5
chr2	139602173	139602450	5
chr7	149757479	149757756	5
chr9	108151444	108151721	5
chr15	79834865	79835142	5
chr7	152187849	152188126	5
chr4	132599127	132599404	5
chr15	102921450	102921727	5
chr14	58694343	58694620	5
chr7	137365985	137366262	5
chr12	81917848	81918125	5
chr17	44620978	44621255	5
chr4	114731558	114732052	5
chr1	69815374	69815831	5
chr11	19250361	19250818	5
chr9	99329036	99329315	5
chr1	174444888	174445167	5
chr7	123967954	123968233	5
chr3	133901607	133901886	5
chr2	130887473	130887752	5
chr17	84451884	84452163	5
chr17	24696067	24696346	5
chr5	124642847	124643127	5
chr10	67741114	67741394	5
chr11	115726055	115726335	5
chr1	88191105	88191385	5
chr2	181394432	181394712	5
chr11	115126549	115126829	5
chr11	118914873	118915153	5
chr1	61363596	61364000	5
chr13	58836979	58837260	5
chr5	98610152	98610433	5
chr1	133640182	133640463	5
chr9	32479412	32479693	5
chr2	174096841	174097122	5
chr17	78624920	78625202	5
chr11	69231215	69231497	5
chr2	165979915	165980197	5
chr17	27108197	27108480	5
chr11	94742296	94742579	5
chr15	85532925	85533208	5
chr15	66070794	66071077	5
chr2	127140389	127140672	5
chr17	45490681	45490964	5
chr15	90509093	90509376	5
chr1	80754166	80754449	5
chr4	54961931	54962214	5
chr2	164266647	164266931	5
chr12	109097068	109097352	5
chr10	68996164	68996448	5
chr10	79614740	79615024	5
chr8	90355390	90355675	5
chr1	130601736	130602021	5
chr2	172639495	172639780	5
chr1	133646394	133646679	5
chr11	19892454	19892739	5
chr6	88140705	88140990	5
chr11	98804190	98804475	5
chr18	11239763	11240048	5
chr4	57880621	57880906	5
chr11	87568211	87568496	5
chr8	120958689	120958974	5
chr1	196449454	196449739	5
chr2	136941516	136941801	5
chr1	20292141	20292426	5
chr17	34816691	34817186	5
chr5	31015170	31015456	5
chr13	45646991	45647277	5
chr11	100257597	100257883	5
chr11	120118334	120118620	5
chr19	7557089	7557376	5
chr7	105813630	105813917	5
chr15	101058461	101058748	5
chr6	72462718	72463005	5
chr15	102813305	102813592	5
chr2	169327938	169328225	5
chr11	103036386	103036673	5
chr5	111408616	111408903	5
chr4	148083103	148083390	5
chr4	104391661	104391948	5
chr18	36671918	36672205	5
chr17	57430157	57430444	5
chr6	127939944	127940231	5
chr8	118034566	118034853	5
chrX	54449245	54449533	5
chr11	75273470	75273758	5
chr11	57651871	57652159	5
chr17	88071586	88071874	5
chr18	35996538	35996827	5
chr9	118137781	118138070	5
chr17	26640011	26640300	5
chr12	38153487	38153776	5
chr19	55948301	55948590	5
chr5	68071687	68071976	5
chr4	104173712	104174118	5
chr10	61599977	61600383	5
chr15	59559731	59560021	5
chr4	62877532	62877822	5
chr6	108535631	108535921	5
chr11	25896807	25897097	5
chr6	7504715	7505005	5
chr15	98575187	98575477	5
chr19	45614396	45614687	5
chr19	44823271	44823562	5
chr6	99015913	99016204	5
chr4	144928355	144928646	5
chr2	118722705	118722996	5
chr11	44139185	44139476	5
chr9	64950415	64950706	5
chr3	95697567	95697858	5
chr1	138842594	138842885	5
chr9	106062199	106062490	5
chr8	37760921	37761212	5
chr7	25270360	25270652	5
chr1	64352187	64352479	5
chr7	108563546	108563838	5
chr4	149403738	149404030	5
chr19	57124158	57124450	5
chr11	87521391	87521683	5
chr8	32483844	32484136	5
chr11	20369417	20369709	5
chr4	114358491	114358783	5
chr13	48875408	48875700	5
chr6	4696428	4696924	5
chr5	119682976	119683269	5
chr4	118926629	118926922	5
chr18	78793866	78794159	5
chr9	49604666	49604959	5
chr8	122027085	122027492	5
chr11	68075882	68076176	5
chr19	45090705	45090999	5
chr2	19831111	19831405	5
chr10	128083584	128083878	5
chr14	52876967	52877261	5
chr16	20715113	20715408	5
chr7	25859039	25859334	5
chr8	33120179	33120474	5
chr8	94400395	94400691	5
chr14	31165797	31166093	5
chr2	115709074	115709370	5
chr4	66063247	66063543	5
chr16	15084999	15085295	5
chr17	57389727	57390135	5
chr1	88937748	88938156	5
chr9	108855217	108855625	5
chr18	69583397	69583694	5
chr19	15032180	15032477	5
chr12	12819431	12819728	5
chr11	77977559	77977856	5
chr1	121318825	121319122	5
chrX	16484930	16485227	5
chr15	54641276	54641573	5
chr2	112080550	112080847	5
chr6	119059104	119059401	5
chr2	56967562	56967860	5
chr9	7670603	7670901	5
chr14	25025841	25026139	5
chr16	74561037	74561335	5
chr11	69831791	69832090	5
chr11	100070030	100070329	5
chr13	84544492	84544791	5
chr17	87166079	87166378	5
chr1	75440186	75440485	5
chr11	103031855	103032154	5
chr9	114493601	114493900	5
chr9	68646750	68647049	5
chr10	126618476	126618937	5
chr6	90771678	90772139	5
chr15	83621668	83622129	5
chr8	73015925	73016334	5
chr2	172371049	172371349	5
chr14	71035312	71035612	5
chr11	115732448	115732748	5
chr14	22834061	22834361	5
chr9	57498783	57499083	5
chr7	150614164	150614464	5
chr9	40938141	40938441	5
chr4	134325566	134325866	5
chr12	76278368	76278668	5
chr4	129472287	129472587	5
chr6	108162614	108162914	5
chr19	5491354	5491654	5
chr11	119799338	119799639	5
chr4	119827437	119827738	5
chr8	97297570	97297871	5
chr16	10676863	10677164	5
chr6	125116614	125116915	5
chr2	114638496	114638797	5
chr4	132570341	132570642	5
chr4	144484008	144484309	5
chr12	80940379	80940681	5
chr3	100934332	100934634	5
chr8	86400070	86400372	5
chr11	96156690	96156992	5
chr7	87305257	87305559	5
chr4	136836552	136836855	5
chr5	41894659	41894962	5
chr4	70194941	70195244	5
chr4	140849399	140849702	5
chr7	30126907	30127210	5
chr6	84454549	84454852	5
chr11	78945532	78945835	5
chr10	122942337	122942641	5
chr2	103530864	103531168	5
chr17	26755527	26755831	5
chr14	26371218	26371522	5
chr13	103892849	103893154	5
chr6	50611670	50611975	5
chr11	102076895	102077200	5
chr5	118593160	118593465	5
chr8	87511845	87512150	5
chr17	46189088	46189393	5
chr1	31210723	31211028	5
chrX	35604537	35604842	5
chr13	115705147	115705453	5
chr8	72444205	72444511	5
chr1	179553523	179553829	5
chr16	97907413	97907719	5
chr12	104565203	104565509	5
chr8	97423045	97423351	5
chr18	68954012	68954318	5
chr2	93454621	93454927	5
chr13	55629922	55630229	5
chr19	5096235	5096542	5
chr3	95471989	95472296	5
chr5	52502699	52503006	5
chr1	152872203	152872510	5
chr4	137051207	137051514	5
chr9	69553537	69553844	5
chr17	28647513	28648012	5
chr4	144674679	144674987	5
chr1	135663496	135663804	5
chr8	129348648	129348956	5
chr7	52669647	52669955	5
chr19	53479039	53479347	5
chr19	41403377	41403685	5
chr15	79833929	79834341	5
chr4	117555359	117555668	5
chr8	23867056	23867365	5
chr11	114712260	114712569	5
chr16	13452766	13453075	5
chr4	130434826	130435135	5
chr14	65206474	65206783	5
chr11	111519870	111520179	5
chr7	28108730	28109039	5
chr15	79878531	79878840	5
chr17	84383230	84383539	5
chr11	89244997	89245307	5
chr11	84581257	84581567	5
chr11	70469442	70469752	5
chr2	92646444	92646754	5
chr13	96318423	96318733	5
chr7	74948455	74948765	5
chr6	113327556	113327866	5
chr2	31275520	31275830	5
chr3	34955481	34955791	5
chr11	85731261	85731571	5
chr8	97438605	97438915	5
chr2	117324302	117324613	5
chr13	51369906	51370217	5
chr3	37565767	37566078	5
chr3	127365134	127365445	5
chr11	85573646	85573957	5
chr18	43596919	43597230	5
chr11	24640388	24640699	5
chr17	84549041	84549352	5
chr19	16357090	16357401	5
chr10	92772038	92772349	5
chr5	122443177	122443488	5
chr11	89915510	89915923	5
chr12	110773291	110773603	5
chrX	65932287	65932599	5
chr17	46193548	46193860	5
chr13	60248096	60248408	5
chr3	17747510	17747822	5
chr7	143252608	143252920	5
chr9	109777768	109778080	5
chr14	55373309	55373621	5
chr8	97523808	97524121	5
chr4	130353567	130353880	5
chr8	106623383	106623696	5
chr19	4333079	4333392	5
chr17	34172801	34173114	5
chr19	55703968	55704282	5
chr4	137270045	137270359	5
chr15	102762813	102763127	5
chr13	28978095	28978409	5
chr5	129633959	129634273	5
chr9	122576222	122576536	5
chr4	101166189	101166503	5
chr14	48454845	48455259	5
chr15	99199119	99199533	5
chr17	49879471	49879885	5
chr6	29384820	29385135	5
chr19	16951343	16951658	5
chr19	6400895	6401210	5
chr2	165532251	165532566	5
chr2	120033641	120033956	5
chr1	73131725	73132041	5
chr1	133867502	133867818	5
chr6	34445227	34445543	5
chr9	44940527	44940843	5
chr15	61354532	61354848	5
chr2	74588057	74588373	5
chr6	91916898	91917214	5
chr2	33399588	33399904	5
chr9	21742088	21742503	5
chr7	108614509	108614924	5
chr4	87318567	87318884	5
chr1	71699999	71700316	5
chr2	71372292	71372609	5
chr17	29594861	29595178	5
chr10	127040242	127040560	5
chr8	8489048	8489366	5
chr13	32172399	32172717	5
chr5	106894470	106894788	5
chr2	38386382	38386700	5
chr10	24167969	24168287	5
chr4	135733913	135734231	5
chr5	120843954	120844272	5
chr10	13684338	13684657	5
chr19	46592976	46593295	5
chr4	142887486	142887805	5
chr17	28393863	28394182	5
chr5	123350394	123350713	5
chr11	68119712	68120031	5
chr10	80403479	80403798	5
chr6	53604559	53604975	5
chr15	79782390	79782806	5
chr11	111112295	111112711	5
chr4	117319981	117320301	5
chr17	43209581	43209901	5
chr5	119678566	119678886	5
chr18	5593269	5593590	5
chr4	132730179	132730500	5
chr4	63596216	63596633	5
chr15	75844788	75845110	5
chr4	119963619	119963941	5
chr3	53402292	53402614	5
chr8	90166850	90167172	5
chr12	107173640	107173962	5
chr2	163725505	163725827	5
chr14	68160179	68160502	5
chr11	103002556	103002879	5
chr2	6798057	6798380	5
chr12	102095861	102096184	5
chr7	26034323	26034741	5
chr2	33058751	33059169	5
chr10	127531449	127531867	5
chr19	5554952	5555276	5
chr6	127984385	127984709	5
chr4	139409067	139409391	5
chr7	73541316	73541640	5
chr5	115885104	115885428	5
chr9	21854277	21854601	5
chr11	98824709	98825034	5
chr14	47684638	47684963	5
chr6	49778214	49778539	5
chr6	126690692	126691017	5
chr17	45256240	45256565	5
chr19	37836724	37837049	5
chr5	122499173	122499498	5
chr2	72394021	72394346	5
chr5	107469482	107469807	5
chr18	35191016	35191341	5
chr1	174431982	174432401	5
chr2	29109249	29109575	5
chr17	26698669	26698995	5
chr2	174391363	174391689	5
chr7	116814995	116815321	5
chr15	61910817	61911143	5
chr10	85753063	85753390	5
chr15	102078914	102079241	5
chr12	82731735	82732062	5
chr5	141082428	141082755	5
chr7	37494407	37494735	5
chr5	137974009	137974337	5
chrX	20219467	20219795	5
chr8	90463442	90463770	5
chr2	62149027	62149355	5
chr18	79223685	79224013	5
chr5	114291646	114291974	5
chr8	122904874	122905202	5
chr14	76093714	76094042	5
chr5	119736981	119737401	5
chr2	85003789	85004118	5
chr10	17353225	17353554	5
chrX	126285056	126285385	5
chr17	53707502	53707831	5
chr12	34647966	34648295	5
chr8	59362161	59362490	5
chr9	60833523	60833852	5
chr17	10554323	10554652	5
chr12	72075826	72076156	5
chr15	102078141	102078471	5
chr8	32069412	32069742	5
chr4	137238477	137238898	5
chr3	156480559	156480980	5
chr14	69898950	69899371	5
chr15	73424088	73424509	5
chr2	22478441	22478862	5
chr8	125936683	125937014	5
chr4	134256893	134257224	5
chr4	142886985	142887316	5
chr4	8838282	8838613	5
chr11	69579705	69580036	5
chr2	158410766	158411097	5
chr11	18924662	18924993	5
chr16	30501844	30502175	5
chr11	74299071	74299403	5
chr4	148151983	148152315	5
chr13	44935670	44936002	5
chr2	164931236	164931568	5
chr1	137255689	137256021	5
chr5	148111955	148112287	5
chr12	112668071	112668403	5
chr4	119955694	119956116	5
chr5	111967652	111968074	5
chr1	134222445	134222778	5
chr10	60255646	60255979	5
chr15	35223741	35224074	5
chr4	109718734	109719067	5
chr11	120117769	120118103	5
chr5	120888005	120888339	5
chr7	29716410	29716744	5
chr1	16163266	16163600	5
chr10	117282177	117282511	5
chr7	134947362	134947785	5
chr10	74566268	74566603	5
chr11	93995897	93996232	5
chr4	139155133	139155468	5
chr12	110838723	110839058	5
chr9	56763825	56764160	5
chr8	108703591	108703926	5
chr17	44870726	44871061	5
chr1	160293045	160293380	5
[truncated: 217 more rows]
