# Supplementary material for: Automated Discovery of Tissue-Targeting Enhancers and Transcription Factors from Binding Motif and Gene Function Data
Source: PLOS journal article supplement (doi:10.1371/journal.pcbi.1003449), 2014-01-30
Supplement: S14 (10.1371/journal.pcbi.1003449.s014) [file journal.pcbi.1003449.s014]

## Sheet: Primers
Element Name	Fwd	Reverse	Vector
Klf14	TTGTGGATCTCACCCTCCAC	TGAAAGCTCCCCCTAAAACA	pGL4.23
Hand1	GGCTGTGTGGGATACATCG	GTCCTGAGGCTGGGATG	pGL4.23 LIC
Bcl191	GGTTTCCTGTGTTGGCTGTT	GGGGACGGGCTATCTAGAAC	pGL4.23 LIC
Dusp1	ACTTGCAGTGAAGGGAGGAA	GGTCAAGTACCTGCCGTGAT	pGL4.23 LIC
Gjb1	ACAAATGTGCTTGCGAACTG	CCTTCCTGTGCGGAAATAAG	pGL4.23 LIC
Junb	CGGAACGAGAGACTTTGGAG	GTGGATGGATGCCTTTGAGT	pGL4.23 LIC
Cbfa2t2	TTATTACTATGACCAGGGGGACT	ACCAGCCAGGGTTACAAAAA	pGL4.23 LIC
Zbtb7b	TGACCTCTGGAGAGGAAAGG	CCCTCCCCAAGCTACATTC	pGL4.23 LIC
Ptpn1	AGGCTCCACCTCACAGGAG	AGCCAGAATCCTTCACTCCA	pGL4.23 LIC
Sh3pxd2a	GAGAGAGAATCCCGGAGACC	CAGAGACTGGTGGGATCCAG	pGL4.23 LIC
Cdh5	GACCACTCGCATATGAAGCA	CTCTGAGCGGAATCCATAGC	pGL4.23 LIC
GPR116	GCGAAATCCAGCAGTGAAAT	TAAGAGGCTCCCAACAGACC	pGL4.23 LIC
GPR56	GGCATTTGGTGGCTGAAG	GCTTGGATTTCTTGGTGGAG	pGL4.23 LIC
KRT14	TGTATCTCCCTGGATGCTGTC	ATGGAGCTCACCCAAGACAC	pGL4.23 LIC
Nos2	GGCTTTCTCACCTGGCACTA	CACCTAGACGGTCCCACATT	pGL4.23 LIC
Plekha6	AGGCACAAGGAAGAAGATGG	TCCACTGGCACAGACTTCAC	pGL4.23 LIC
Prtg	ATTTTAAGGGCACAGAGCAG	AGCTCCCGTTCTCTCTTCCT	pGL4.23 LIC
Gata2	TCCTCCAAGGCTAGGTACTTG	GGCCTAGGGACTGGGGTA	pGL4.23 LIC
Dpf3	TGGGTAATACAGAGCCCACT	CCTGCGCTGGTTTGATTT	pGL4.23 LIC
Slc9a3r1	TGGCAAGCCTAGGCAGA	CATGGGGACATGAGGTCAG	pGL4.23 LIC
Ankrd33	TTGCGTGGAGAGCCTGA	TTCCCGGGGTTTGACAC	pGL4.23 LIC
Tcfap2c	CCAGTGTCCACGGAAGC	TCTCCTCCCCACGTTCC	pGL4.23 LIC
Hand1 (2)	GCAAAGGAAGTGGCTGTGA	AATCTGCCAGCCACAATAGTA	pGL4.23 LIC
Mdfi	TTCTAGGGATACCCTCCTCCA	AGGGTCTGAGCTGCCACTT	pGL4.23 LIC
Zfp36	CACATGCCGAGTGAGCA	GCCCCACACCTTGTGC	pGL4.23 LIC
Epas1	CCGATATTGCTGGGCTCT	CCCCTGGAAATTCCCTTC	pGL4.23 LIC
Npc2	TGGGGAGGGGAGACGTA	TGGCGGGCTTTTGCTAT	pGL4.23 LIC
Bcor	GCCAGGTGCAAAAGGGATA	GGCCTGAGAAACTAAGGGTGT	pGL4.23 LIC
Efna3	GCTCCACGGGAAAGGTG	CTGGAAGACCTGAGGCAGA	pGL4.23 LIC
Tgfbr3	TTGCTGCCACAAAGTTGAC	TGAACCCAGTCCCTGCTT	pGL4.23 LIC
Zbtb7c	CCCTAGGGCCAAGAAGG	CAGCCCCAGATCCCATC	pGL4.23 LIC
Hic2	GGTGCCCTTTGGGACTG	GTGGGGGAAGGGGCTAT	pGL4.23 LIC
Dll4	GCCCAGTGTCCAGTCAGC	TGATGGGCCTGGTCTGA	pGL4.23 LIC
Casz1	AGGGGCAGGGACTGTGA	TGGGTAAGGCCCTCCTG	pGL4.23 LIC
Fgr	GGGAGAGCCCTGAGAGG	GCAGGAGACCCCTGAACA	pGL4.23 LIC
Sppl3	CTGTTTCATCTCCCCAGGA	GATGGGTGGAGACCATGC	pGL4.23 LIC
Neocortical Enhancer (1)	GCATGCTTGTGCTATCCATT	CCCATCATGCATTCTGCTAA	pGL4.23
Neocortical Enhancer (2)	GCGTTCACTTTCCCAGCTAC	CCTGATAAATGCTGAGGCTAGA	pGL4.23
Neocortical Enhancer (3)	ATTCCGGAGCCCAGAAGTAT	CATGAAACCCTTCAAAATTGC	pGL4.23
Neocortical Enhancer (4)	TGTCAAAGGCAATTAATGAGAAAA	GAGATGGTTGCTTCATTGCAT	pGL4.23
Neocortical Enhancer (5)	TGCCTCTTGGTTCAAACTTACT	TTTCTGCAACGCAGACAAAG	pGL4.23 LIC
Neocortical Enhancer (6)	AGCGAAGGCCTCCATTAAGT	GGATGGGATTCCAGCAGATA	pGL4.23
Neg Ctrl (1)	GGGTCAGTGGGAGGCACT	GGGACCTATGGAGACCTTCC	pGL4.23 LIC
Neg Ctrl (2)	TCTTCCACCCCGTGACC	TGTGTCTGAGGTGAGCAAATG	pGL4.23 LIC
Neg Ctrl (3)	TGAAAGGGAGACCGGTGTAA	GGAGCATGGATCCTTTCAA	pGL4.23 LIC
Neg Ctrl (4)	CCATTTTGTTGAGGTGTGTCTT	CTCAGAAGGCCAGGCAAG	pGL4.23 LIC
Neg Ctrl (5)	GCCCTTCAGGGGAGCA	GTGGGGCCAGGTCAGA	pGL4.23 LIC
Neg Ctrl (6)	AGAGCCATTCATTCCGTCA	GCCCATCTTGGGAAAGC	pGL4.23 LIC
Neg Ctrl (7)	CCCTTCCTGCTTCTGGTG	CCATCCAGGTGGCACAA	pGL4.23 LIC
Neg Ctrl (8)	CCAGTCGCGGTTTACAGTCT	GTTAGTTGCAGGACCGGAGA	pGL4.23
Neg Ctrl (9)	GGTTGGAGATGTGGCAGAGT	CTGCAGTAGAGCTGCCCTTT	pGL4.23
mPL-II	CTGGAGGCAAATGGTAAAGG	CCAAGGATGATCCAGCAAAT	pGL4.23
