# Supplementary material for: Automated Discovery of Tissue-Targeting Enhancers and Transcription Factors from Binding Motif and Gene Function Data
Source: PLOS journal article supplement (doi:10.1371/journal.pcbi.1003449), 2014-01-30
Supplement: S15 (10.1371/journal.pcbi.1003449.s015) [file journal.pcbi.1003449.s015]

| Gene | q-value | TFBS clusters | PMID | Notes |
| --- | --- | --- | --- | --- |
| Rara | 5.36E-15 | 10 | 7607068, 7607067 | 50% of Rara and Rarg double knockouts survive until birth. |
| **Pdgfb** | 2.34E-12 | 10 | 10419690 | Involved in development of the placenta labyrinthine layer |
| **Junb** | 3.73E-11 | 6 | 10022836 | Knockout mice have multiple placenta defects |
| Pim1 | 5.97E-10 | 9 | 15199164 | Pim1,2,3 triple knockout mice have reduced body size. PIM proteins are required for proliferation of peripheral T lymphocytes. |
| **Epha2** | 7.63E-08 | 7 | 22173506 | EphA2 can promote invasion and proliferation of a human extravillous trophoblastic cell line |
| Fgd2 | 1.39E-07 | 7 |  |  |
| Zbtb7b | 3.06E-07 | 5 | 22246292 | Promoter of Serpina3 is activated by Zbtb7b. 'T' allele of a SNP in this region predisposes to intrauterine growth restriction (IUGR) and does not respond to Zbtb7b whereas 'G' allele does respond. |
| Rarg | 6.58E-07 | 5 | 7607068, 7607067 | 50% of Rara and Rarg double knockouts survive until birth. |
| **Socs3** | 1.33E-06 | 6 | 11481489 | Knockout mice have multiple placenta defects |
| Tbx3 | 1.56E-06 | 12 | 12668638 | Knockout mice have yolk sac defects |
