# Supplementary material for: Automated Discovery of Tissue-Targeting Enhancers and Transcription Factors from Binding Motif and Gene Function Data
Source: PLOS journal article supplement (doi:10.1371/journal.pcbi.1003449), 2014-01-30
Supplement: S16 (10.1371/journal.pcbi.1003449.s016) [file journal.pcbi.1003449.s016]

| **Term Name** | **q-val** | **Fold enrichment** |
| --- | --- | --- |
| abnormal trophoblast layer morphology | 2.49E-06 | 3.53 |
| abnormal trophoblast giant cells | 5.55E-04 | 3.44 |
| placenta development | 7.46E-04 | 2.56 |
| embryonic placenta development | 8.45E-04 | 2.92 |
| abnormal placenta vasculature | 3.34E-02 | 1.99 |
| trophoblastic neoplasm | 4.03E-02 | 4.22 |
