# Supplementary material for: Automated Discovery of Tissue-Targeting Enhancers and Transcription Factors from Binding Motif and Gene Function Data
Source: PLOS journal article supplement (doi:10.1371/journal.pcbi.1003449), 2014-01-30
Supplement: S17 (10.1371/journal.pcbi.1003449.s017) [file journal.pcbi.1003449.s017]

| **Ontology** | **Term** | **Placenta TFBS clusters Fold enrichment** | **Mouse placenta-specific regions Fold enrichment** | **Placenta TFBS clusters : Mouse placenta-specific regions** |
| --- | --- | --- | --- | --- |
| GO Biological Process | embryonic placenta development | 5.12 | 2.80 | 1.74 |
| GO Biological Process | placenta development | 4.13 | 2.87 | 1.36 |
| Disease ontology | trophoblastic neoplasm | 3.80 | 2.76 | 1.27 |
| Mouse Phenotype Single KO | abnormal trophoblast layer morphology | 3.79 | 3.18 | 1.14 |
| Mouse Phenotype Single KO | abnormal trophoblast giant cells | 3.58 | 3.87 | 0.87 |
| Mouse Phenotype Single KO | abnormal placenta vasculature | 3.46 | 2.1 | 1.58 |
