# Supplementary material for: Automated Discovery of Tissue-Targeting Enhancers and Transcription Factors from Binding Motif and Gene Function Data
Source: PLOS journal article supplement (doi:10.1371/journal.pcbi.1003449), 2014-01-30
Supplement: S19 (10.1371/journal.pcbi.1003449.s019) [file journal.pcbi.1003449.s019]

## Sheet: Pancreas TFs and TFBS Clusters
Pancreas TFBS clusters					Top 50 TFs
mm9 Chromosome	Start	End	# TFBS in cluster		Rank	Motif Name	Possible TF
chr2	50224697	50224856	10		1	J_NF_kappaB	Nfkb1
chrX	156114344	156114692	9		2	W_JUN_01	Jun
chr3	31801864	31802270	9		3	B_Gata6_primary	Gata6
chr19	18962266	18962575	9		4	J_SOX9	Sox9
chr9	116558707	116559092	9		5	V_GLI1_01	Gli1
chr17	43532565	43532952	9		6	V_IK1_01	Ikzf1
chr2	115806047	115806209	8		7	V_FOXO1_02	Foxo1
chrX	61537073	61537245	8		8	J_HNF4A	Hnf4a
chr7	78209860	78210071	8		9	B_Sox4_primary	Sox4
chr14	27907425	27907663	8		10	L_NFATC1_01	Nfatc1
chr18	79288808	79289044	8		11	B_Lef1_primary	Lef1
chr3	42569092	42569341	8		12	B_Foxj3_secondary	Foxj3
chr18	5591629	5591887	8		13	V_REX1_02	Zfp42
chr13	78942146	78942421	8		14	B_Ehf_primary	Ehf
chr16	70112270	70112552	8		15	J_TLX1_NFIC	Tlx1
chr12	74077308	74077612	8		16	B_IRC900814_primary	Arhgef12
chr11	25783255	25783560	8		17	G_NGN_NEUROD_01	Neurod1
chr5	106813650	106813961	8		18	V_NF1	Nfic
chr12	46608250	46608637	8		19	V_CEBP_Q2_01	Cebp
chr4	83564410	83564725	8		20	G_GRHL3_01	Grhl
chr13	89918750	89919069	8		21	B_Zfp105_secondary	Zfp105
chr1	66684789	66685112	8		22	B_Sfpi1_primary	Sfpi1
chr3	145627273	145627598	8		23	V_NF1_Q6	Nfic
chr14	17394361	17394758	8		24	B_Six6_secondary	Six6
chr6	8370039	8370377	8		25	G_MESP1_2_01	Mesp1
chr11	88465271	88465616	7		26	B_Pitx2_2274_3	Pitx2
chr14	115256550	115256908	7		27	G_HPF1_01	Znf83
chr5	4563960	4564320	7		28	J_Hand1_Tcfe2a	Hand1
chr13	100024902	100025281	7		29	V_HELIOSA_02	Ikzf2
chr18	40287507	40287594	7		30	V_ATF3_Q6	Atf3
chr4	134029855	134029954	7		31	V_ZID_01	Zbtb6
chr1	62467784	62467889	7		32	B_Nkx6_1_2825_1	Nkx6.1
chr5	15671998	15672112	7		33	B_Six1_0935_2	Six1
chr19	43460253	43460382	7		34	W_Tbx2_secondary_01	Tbx2
chr3	137343002	137343157	7		35	W_Tbx1_01	Tbx1
chr11	25901648	25901819	7		36	W_Sox10_01	Sox10
chr14	13206968	13207125	7		37	J_Ar	Ar
chr8	23319697	23319865	7		38	W_Ahctf1_01	Ahctf1
chr10	67694213	67694434	7		39	L_TCF4_TCF4_01	Tcf4
chr11	84106668	84106859	7		40	W_Hoxc11_3718_2_secondary	Hoxc11
chr4	22213842	22214064	7		41	W_Zfp637_01	Zfp637
chr12	57925738	57925953	7		42	V_SMAD_Q6_01	Smad2
chr6	53638328	53638553	7		43	B_Osr1_primary	Osr1
chr14	80892847	80893068	7		44	B_IRC900814_secondary	Arhgef12
chr2	91278048	91278278	7		45	B_Cphx_3484_1	Cphx
chr3	65622592	65622799	7		46	L_RUNX3_01	Runx3
chr1	57261601	57261796	7		47	B_Srf_primary	Srf
chr6	28782992	28783228	7		48	W_Obox1_3970_2_secondary	Obox1
chr11	68154479	68154687	7		49	B_E2F2_secondary	E2f2
chr14	93899071	93899297	7		50	V_COMP1_01	Comp1
chr1	128358494	128358714	7
chr2	72475359	72475597	7
chr14	24067929	24068174	7
chr14	24268726	24268978	7
chr3	54078543	54078797	7
chr1	52733715	52733972	7
chr13	103685087	103685347	7
chr2	132916332	132916596	7
chr18	55135985	55136365	7
chr7	56654131	56654398	7
chr12	56673667	56673938	7
chr11	24241658	24241930	7
chr1	189762694	189762967	7
chr19	59936685	59936958	7
chr19	45729908	45730182	7
chr1	186606068	186606343	7
chr16	43641578	43641855	7
chr2	79300721	79300999	7
chr5	124028064	124028447	7
chr3	146222137	146222420	7
chr19	60066972	60067257	7
chr3	17223146	17223431	7
chr6	23284828	23285117	7
chr13	47878271	47878560	7
chr9	75746866	75747156	7
chr1	188749444	188749736	7
chr2	124633859	124634151	7
chr1	80820564	80820857	7
chr8	91827458	91827753	7
chr5	77784812	77785108	7
chr19	56177317	56177613	7
chr14	29646016	29646317	7
chr2	115421737	115422039	7
chr3	143869945	143870248	7
chr14	98434576	98434880	7
chr4	97275316	97275622	7
chr11	18653536	18653972	7
chr10	67701026	67701333	7
chr2	135793737	135794044	7
chr13	18252627	18252934	7
chr16	76507579	76507888	7
chr3	119228429	119228742	7
chr3	30400072	30400387	7
chr2	108731964	108732359	7
chr18	29402237	29402554	7
chr2	47721514	47721831	7
chr19	59147090	59147408	7
chr16	77329995	77330316	7
chr18	41269338	41269659	7
chr2	172761756	172762079	7
chr17	44854522	44854846	7
chr19	29124160	29124486	7
chr10	69227013	69227342	7
chr17	78513000	78513331	7
chr18	39032086	39032417	7
chr11	18835229	18835674	7
chr11	37745546	37745879	7
chr1	12605773	12606106	7
chr9	24766389	24766794	7
chr10	107369540	107369876	7
chrX	98625257	98625595	7
chr4	70466287	70466625	7
chr5	119564078	119564421	7
chr2	76851922	76852265	7
chr1	17089439	17089782	7
chr1	67256406	67256750	7
chr17	52074067	52074419	6
chr9	112110205	112110559	6
chr18	55440805	55441159	6
chr17	4406142	4406499	6
chr4	87131683	87132106	6
chr17	26758314	26758682	6
chr19	60374600	60374969	6
chr1	189859832	189860202	6
chr5	51948384	51948754	6
chr4	138709916	138710291	6
chr8	118288580	118289010	6
chr3	29898157	29898534	6
chr13	108784024	108784457	6
chr2	44960185	44960655	6
chr1	12679181	12679562	6
chr1	76843020	76843402	6
chr4	96927501	96927885	6
chr5	99045847	99046234	6
chr3	3878346	3878394	6
chr12	72589380	72589451	6
chr15	35551591	35551675	6
chr3	151881057	151881138	6
chr5	19728173	19728258	6
chr5	76366020	76366123	6
chr6	51113473	51113578	6
chr11	45144663	45144788	6
chr13	26554517	26554637	6
chr14	100995489	100995604	6
chr14	18648805	18648898	6
chr11	18799904	18800007	6
chr2	152083415	152083516	6
chr7	143808742	143808846	6
chr14	13586896	13587039	6
chr15	40538959	40539061	6
chr12	55096349	55096496	6
chr11	25057990	25058138	6
chr10	19145177	19145313	6
chr6	144251554	144251695	6
chrX	153351270	153351395	6
chr10	56357806	56357942	6
chr11	85491597	85491769	6
chr1	123290094	123290225	6
chr6	93063443	93063581	6
chr19	14464517	14464645	6
chr1	181080285	181080397	6
chr13	82698056	82698181	6
chr13	60306658	60306819	6
chr11	24945080	24945199	6
chr3	138556781	138556898	6
chr2	146907549	146907699	6
chr18	13954457	13954610	6
chrX	49727474	49727640	6
chrX	48870083	48870223	6
chr6	94154659	94154812	6
chr16	36526946	36527106	6
chr6	53519918	53520059	6
chr1	191226723	191226891	6
chr11	110672172	110672340	6
chr3	21524680	21524837	6
chr6	115296027	115296202	6
chr17	15898634	15898751	6
chr1	170131551	170131698	6
chr10	89083254	89083387	6
chr12	120050612	120050744	6
chr6	17953181	17953386	6
chr6	137478956	137479086	6
chr13	102300254	102300424	6
chr18	61987130	61987269	6
chr11	111145280	111145501	6
chr1	56801831	56801995	6
chr7	124721862	124722004	6
chr19	23005163	23005312	6
chr13	63642858	63643056	6
chr4	119942205	119942400	6
chr8	49938574	49938754	6
chr14	106214390	106214537	6
chr6	149035363	149035548	6
chr9	118750942	118751092	6
chr18	55187861	55188050	6
chr11	87510750	87510963	6
chr2	31451449	31451629	6
chr8	83332141	83332351	6
chr10	69568406	69568600	6
chr3	30404571	30404777	6
chr2	152560712	152560935	6
chr10	79399910	79400098	6
chr9	117161975	117162172	6
chr17	29867627	29867833	6
chr16	74561051	74561226	6
chr2	91733281	91733482	6
chr8	122710077	122710310	6
chr2	144150409	144150626	6
chr10	42737642	42737820	6
chr16	17920824	17921073	6
chr2	116519114	116519333	6
chr5	133632340	133632546	6
chr2	169335465	169335699	6
chr4	83385224	83385411	6
chr5	116122511	116122753	6
chr14	28832373	28832616	6
chr15	50520466	50520694	6
chr13	77466490	77466709	6
chr2	38462706	38462908	6
chr6	144004705	144004884	6
chr2	139602253	139602450	6
chr12	96811946	96812128	6
chr11	89245131	89245328	6
chrX	139502845	139503064	6
chr1	130519414	130519644	6
chr6	143238831	143239041	6
chr2	115896977	115897165	6
chr8	117234879	117235112	6
chr5	29794789	29795023	6
chr12	41261830	41262051	6
chr19	20634536	20634775	6
chr11	18256551	18256778	6
chr8	106909648	106909883	6
chr4	94413419	94413655	6
chr12	10003226	10003456	6
chrX	125351569	125351815	6
chr6	144547105	144547303	6
chr2	19201835	19202082	6
chr8	94628712	94628956	6
chr5	132499447	132499676	6
chr6	137889886	137890127	6
chr14	79557361	79557598	6
chr12	55082329	55082570	6
chr13	105184794	105185032	6
chr1	51152992	51153221	6
chr9	32224532	32224768	6
chr13	110060085	110060331	6
chr19	56212932	56213182	6
chr1	51878865	51879108	6
chr18	54736150	54736395	6
chr8	28081884	28082134	6
chr10	37347325	37347548	6
chr3	35223680	35223931	6
chr4	82336311	82336562	6
chr3	5340868	5341120	6
chr5	47734961	47735213	6
chr8	94514581	94514833	6
chr1	42318995	42319247	6
chr4	6616397	6616650	6
chr6	53524114	53524368	6
chr12	108500967	108501221	6
chr1	132900070	132900326	6
chr13	18554562	18554818	6
chr5	111654143	111654402	6
chr12	12408399	12408659	6
chr2	43926558	43926819	6
chr14	12668489	12668750	6
chr2	116730079	116730340	6
chr4	7174443	7174704	6
chr6	53639007	53639269	6
chr2	146912169	146912431	6
chr9	104353286	104353548	6
chr6	117522403	117522666	6
chr2	44391495	44391758	6
chr15	50933029	50933292	6
chr13	53697560	53697823	6
chr11	18789247	18789514	6
chr17	86951099	86951366	6
chr12	13127406	13127673	6
chr3	144045948	144046215	6
chr8	123059895	123060163	6
chr6	139079952	139080220	6
chr8	8655097	8655365	6
chr2	139681406	139681674	6
chr10	96241841	96242231	6
chr6	50611585	50611975	6
chr13	63729135	63729525	6
chr10	68202975	68203245	6
chr13	31096359	31096631	6
chr4	5890410	5890682	6
chr4	5652090	5652363	6
chr1	187987126	187987399	6
chr9	118227793	118228067	6
chr5	33900858	33901132	6
chr2	45081323	45081597	6
chr2	74045391	74045782	6
chr5	119830313	119830588	6
chr1	190507896	190508171	6
chr3	27472596	27472871	6
chr15	98369272	98369548	6
chr10	38693039	38693315	6
chr13	17265298	17265575	6
chr2	125129931	125130209	6
chr3	147956946	147957224	6
chr12	57353818	57354096	6
chrX	92634157	92634436	6
chr14	105280121	105280400	6
chr10	70682235	70682514	6
chr4	23921429	23921821	6
chr9	48644360	48644640	6
chr10	20174148	20174428	6
chr4	83776915	83777196	6
chr6	17463764	17464046	6
chr4	99126386	99126668	6
chr1	57861501	57861785	6
chr1	56405733	56406017	6
chr11	32986065	32986350	6
chr19	55486440	55486726	6
chr1	190551322	190551608	6
chr3	52362854	52363141	6
chr17	62810894	62811183	6
chr1	108709824	108710113	6
chr8	37760921	37761211	6
chr11	69715072	69715364	6
chr15	40871261	40871556	6
chr2	71529020	71529315	6
chr8	92820695	92820990	6
chr2	142155679	142155974	6
chr8	46794907	46795202	6
chr4	135899726	135900025	6
chr17	62767265	62767564	6
chr8	6448471	6448771	6
chr3	34618860	34619160	6
chr8	110465127	110465427	6
chr12	72402544	72402845	6
chr11	111517063	111517365	6
chr19	45711364	45711763	6
chr2	24326715	24327020	6
chr8	129044998	129045303	6
chr8	111087148	111087454	6
chr8	117585043	117585349	6
chr9	4794833	4795139	6
chr5	118534475	118534781	6
chr2	74581060	74581366	6
chr9	90724204	90724510	6
chr3	75633210	75633516	6
chr13	32705365	32705813	6
chr18	57798243	57798550	6
chr4	58581280	58581589	6
chr11	25337635	25337944	6
chr2	125088972	125089281	6
chr3	143666111	143666421	6
chr13	44266127	44266437	6
chr7	136363579	136363889	6
chr3	128768567	128768879	6
chr2	105526751	105527063	6
chr3	35253333	35253645	6
chr7	140352578	140352891	6
chr8	118235049	118235363	6
chr14	87687696	87688010	6
chr3	28307491	28307805	6
chr13	56799921	56800235	6
chr16	67530774	67531089	6
chr15	56512499	56512814	6
chr10	116786607	116786923	6
chr18	54694157	54694473	6
chr12	87886715	87887032	6
chr3	128050773	128051091	6
chr7	119966886	119967291	6
chr16	74226359	74226678	6
chr13	56736359	56736678	6
chr6	143806130	143806449	6
chr13	84190683	84191002	6
chr18	19179594	19179913	6
chr13	117101267	117101719	6
chr10	36914255	36914576	6
chr19	55499305	55499626	6
chr18	41247089	41247410	6
chr14	16282299	16282620	6
chr19	22140207	22140529	6
chr13	29569395	29569718	6
chr3	143247563	143247887	6
chr16	40594975	40595299	6
chr11	112514848	112515172	6
chr13	44594569	44594894	6
chr2	147702962	147703289	6
chr13	52015917	52016244	6
chr8	30067887	30068216	6
chr18	69818860	69819190	6
chr4	58352017	58352473	6
chr5	106937277	106937608	6
chr2	58432545	58432876	6
chr5	132106735	132107066	6
chr3	146759260	146759671	6
chr16	28707264	28707596	6
chr12	35083108	35083440	6
chr14	49281344	49281676	6
chr11	96837369	96837701	6
chr1	42537880	42538213	6
chr11	111869168	111869501	6
chr2	33651878	33652211	6
chr16	20696065	20696398	6
chr5	91813413	91813746	6
chrX	46349389	46349801	6
chr14	99702223	99702557	6
chr16	72680948	72681283	6
chr10	17279883	17280218	6
chr10	93186790	93187126	6
chr7	79008189	79008526	6
chr1	41976536	41976950	6
chr13	89862815	89863153	6
chr6	143991312	143991651	6
chr1	19240734	19241074	6
chr5	119750876	119751217	6
chr17	44694714	44695055	6
chr13	47022852	47023194	6
chr14	23469430	23469847	6
chr11	57497281	57497624	6
chr12	34997733	34998076	6
chr15	50078686	50079030	6
chr12	80795144	80795488	6
chr6	98063739	98064157	6
chr17	50376486	50376831	6
chr13	115250064	115250409	6
chr18	69593458	69593803	6
chr2	12762474	12762820	6
chr19	15032007	15032354	6
chr9	111521798	111522145	6
chr11	17324103	17324450	6
chr10	16933107	16933454	6
chr13	114841346	114841694	6
chr4	35418548	35418896	6
chr9	22781078	22781426	6
chr5	119455846	119456266	6
chr14	100881136	100881556	6
chr16	25454168	25454517	6
chr7	56513619	56513968	6
chr18	30322439	30322789	6
chr14	119745859	119746209	6
chr4	123778490	123778841	6
chrX	78046980	78047331	6
chr18	66175603	66175954	6
chr17	29913313	29913664	6
chr18	36450817	36451168	6
chr14	65027181	65027532	6
chr18	11510395	11510747	6
chr4	108998280	108998633	6
chr12	5263816	5264171	5
chr8	94512528	94512884	5
chr16	72416355	72416711	5
chr1	34353192	34353549	5
chr17	71130737	71131095	5
chr10	15126012	15126370	5
chr12	70858890	70859249	5
chr1	41869807	41870166	5
chr17	62029898	62030258	5
chr10	28474758	28475118	5
chr14	120569238	120569599	5
chr5	55897765	55898126	5
chr10	67591061	67591489	5
chr1	78078447	78078875	5
chr18	70152257	70152619	5
chr4	70366475	70366905	5
chr3	89055070	89055435	5
chr18	6979007	6979374	5
chr14	104725593	104725960	5
chr7	35970032	35970464	5
chr8	18738876	18739244	5
chr10	50463597	50463965	5
chr1	189610952	189611321	5
chr14	12242281	12242650	5
chr16	7346341	7346774	5
chr10	67711263	67711633	5
chr13	44746959	44747329	5
chr10	79743295	79743666	5
chr3	17747340	17747846	5
chr5	122423648	122424020	5
chr14	23107458	23107830	5
chr18	57131701	57132073	5
chr6	144596998	144597433	5
chr14	17674622	17674995	5
chr6	51756628	51757001	5
chr17	90943808	90944181	5
chr13	90273260	90273696	5
chr1	150318168	150318542	5
chr19	36302104	36302479	5
chr10	16955774	16956211	5
chr4	84172834	84173210	5
chr19	57124074	57124450	5
chr2	59432692	59433069	5
chr15	26569113	26569491	5
chr3	89125386	89125764	5
chr14	46763913	46764292	5
chr3	35253972	35254351	5
chr5	29514434	29514874	5
chr5	99306035	99306475	5
chr5	29270210	29270590	5
chr10	67819617	67819997	5
chr1	55950066	55950446	5
chr11	107332878	107333388	5
chr13	56058761	56059142	5
chr17	51396517	51396899	5
chr10	114910355	114910737	5
chr2	169787563	169787946	5
chr3	99142738	99143121	5
chr10	129719135	129719519	5
chr13	75789068	75789452	5
chr10	68736410	68736795	5
chr1	189427177	189427621	5
chr9	32251565	32251951	5
chr16	62286192	62286578	5
chr13	100251313	100251699	5
chr1	84043580	84044025	5
chr14	72316226	72316613	5
chr7	20010778	20011165	5
chr6	53480155	53480542	5
chr7	77500248	77500635	5
chr18	27077043	27077431	5
chr19	33174320	33174709	5
chr1	190891458	190891847	5
chr1	108475075	108475464	5
chr13	83743046	83743435	5
chr5	86173971	86174362	5
chr14	29078926	29079317	5
chr17	63133049	63133440	5
chr4	84016512	84016903	5
chr1	195928669	195929060	5
chr5	86001217	86001608	5
chr1	173304654	173305046	5
chr10	67823955	67824404	5
chr11	85445437	85445830	5
chr5	21753391	21753785	5
chr17	67162206	67162600	5
chr18	57389411	57389806	5
chr13	116097828	116098224	5
chr17	44464866	44465262	5
chr7	120126818	120127214	5
chr1	54707353	54707805	5
chr13	119965605	119966057	5
chr1	189945180	189945670	5
chr14	20780020	20780418	5
chr15	94312855	94313253	5
chr11	19459708	19460107	5
chr7	35893426	35893825	5
chr13	84192160	84192559	5
chr2	44253469	44253868	5
chr13	6407878	6408277	5
chr3	34821991	34822391	5
chr1	71668169	71668569	5
chr13	78114082	78114110	5
chr15	80913650	80913682	5
chr4	49811864	49811903	5
chr2	93917640	93917681	5
chr8	118136390	118136437	5
chr13	105833935	105833978	5
chr9	15992496	15992541	5
chr2	159351425	159351480	5
chr16	85986770	85986822	5
chr9	115246443	115246510	5
chr4	139195997	139196058	5
chr4	100582588	100582647	5
chr4	147905585	147905650	5
chr14	80111475	80111542	5
chr7	140755547	140755613	5
chr3	34980972	34981035	5
chr8	50525441	50525505	5
chr9	49401376	49401452	5
chr9	117025727	117025801	5
chr6	99277948	99278014	5
chr10	110963309	110963391	5
chr5	17101095	17101181	5
chr1	190262062	190262136	5
chr3	26227736	26227814	5
chr12	51395885	51395974	5
chr2	79894710	79894791	5
chr3	74591906	74591985	5
chr6	5880639	5880717	5
chr11	120126790	120126874	5
chr10	119677262	119677352	5
chr6	147824564	147824639	5
chr2	71848022	71848105	5
chr2	75591251	75591335	5
chr1	14848330	14848408	5
chr8	93837122	93837210	5
chr19	59829890	59829964	5
chr19	60374273	60374363	5
chr6	32897841	32897955	5
chr11	24801122	24801222	5
chr1	42290036	42290140	5
chr13	48490791	48490875	5
chr6	17254512	17254611	5
chr10	49599338	49599422	5
chr7	25736310	25736412	5
chr16	45094038	45094140	5
chr11	112120027	112120138	5
chr2	71884435	71884548	5
chr8	25549440	25549542	5
chr8	129068113	129068215	5
chr4	87439572	87439688	5
chr18	35441651	35441761	5
chrX	95515078	95515165	5
chr3	84846118	84846210	5
chr4	67794569	67794655	5
chr12	57262274	57262369	5
chr2	153552960	153553065	5
chr2	159068170	159068270	5
chr14	84851636	84851725	5
chr3	102186184	102186301	5
chr2	114602002	114602125	5
chr12	33503917	33504019	5
chr14	49693040	49693148	5
chr13	81948479	81948573	5
chr19	19960526	19960647	5
chr2	34212265	34212389	5
chr7	123010122	123010231	5
chr11	76202707	76202836	5
chr13	83591335	83591432	5
chr13	17411501	17411592	5
chr12	54895260	54895355	5
chr1	68418293	68418409	5
chr5	42027875	42027992	5
chr16	52429749	52429850	5
chr3	17724895	17724995	5
chr5	5290814	5290939	5
chr9	44638290	44638389	5
chr7	122768844	122768958	5
chr13	84007853	84007964	5
chr4	99903732	99903847	5
chr12	10135161	10135288	5
chr15	84090924	84091058	5
chr16	49681757	49681872	5
chr1	57217128	57217228	5
chr9	71244708	71244845	5
chr16	85040643	85040746	5
chr4	63663369	63663502	5
chr1	59925575	59925681	5
chr3	152430592	152430731	5
chr13	79011261	79011391	5
chr12	7436632	7436737	5
chr13	82972661	82972786	5
chr3	29900275	29900391	5
chr5	112840490	112840630	5
chr11	44607770	44607881	5
chr19	49153294	49153403	5
chr19	32720696	32720808	5
chr8	78586695	78586794	5
chr5	31229061	31229199	5
chr16	93154100	93154213	5
chr19	53181567	53181675	5
chr6	28782102	28782240	5
chr5	133450870	133451013	5
chr14	27483490	27483591	5
chr5	23931852	23931993	5
chr2	17956904	17957009	5
chr2	108143818	108143921	5
chr16	24807339	24807459	5
chr7	98291207	98291340	5
chr2	50319447	50319573	5
chr6	39218984	39219098	5
chr1	59545047	59545199	5
chr18	64496298	64496412	5
chr13	117085088	117085226	5
chr18	55060755	55060883	5
chr6	97847703	97847854	5
chr15	55457540	55457649	5
chr1	61366437	61366565	5
chr10	120182066	120182201	5
chr2	57155114	57155217	5
chr12	85801910	85802066	5
chr14	8669375	8669512	5
chr13	119529297	119529459	5
chr3	101859457	101859609	5
chr11	39482722	39482880	5
chr8	130717672	130717801	5
chr1	40671852	40671989	5
chr13	109983217	109983369	5
chr10	99485191	99485349	5
chr8	123545343	123545500	5
chr1	64620928	64621042	5
chr2	43386474	43386597	5
chr8	128521378	128521542	5
chr4	87658715	87658883	5
chr11	44506240	44506385	5
chr14	84502830	84502951	5
chr10	125392559	125392728	5
chr10	44240190	44240352	5
chr13	16077701	16077817	5
chr1	19212383	19212540	5
chr19	37770289	37770446	5
chr8	50444827	50444968	5
chr2	79438725	79438899	5
chr10	38735034	38735198	5
chr16	6517300	6517424	5
chr10	7791262	7791423	5
chr4	64832572	64832705	5
chr18	23286374	23286492	5
chr2	44038672	44038836	5
chr8	30328167	30328320	5
chr10	107339926	107340076	5
chr1	16396995	16397120	5
chr10	42746553	42746725	5
chr5	97046123	97046281	5
chr10	67315278	67315421	5
chr11	43999048	43999198	5
chr7	58879901	58880058	5
chr6	19905353	19905498	5
chr15	9455097	9455232	5
chr6	125528064	125528211	5
chr2	115702575	115702747	5
chr5	91965430	91965564	5
chr4	80817824	80817985	5
chr3	141615994	141616162	5
chr14	17893080	17893236	5
chr3	143423795	143423917	5
chr1	62262564	62262762	5
chr7	131127227	131127390	5
chr2	37907437	37907585	5
chr14	104900970	104901150	5
chr10	67908398	67908559	5
chr4	8749706	8749841	5
chr18	69069253	69069399	5
chr8	110552410	110552592	5
chr3	130441078	130441217	5
chr6	17123243	17123406	5
chr14	24203381	24203526	5
chr17	4806986	4807134	5
chr4	98031097	98031263	5
chr13	91561343	91561504	5
chr6	87351623	87351765	5
chr2	106265168	106265333	5
chr11	112005837	112006023	5
chr19	56711872	56712029	5
chr2	9517043	9517232	5
chr2	106368293	106368424	5
chr9	85566714	85566851	5
chr10	13581297	13581445	5
chr11	83642592	83642767	5
chr17	75764130	75764306	5
chr5	75151354	75151501	5
chr11	108389506	108389686	5
chr11	110884907	110885053	5
chr5	148497489	148497664	5
chr8	111137091	111137238	5
chr2	34416140	34416300	5
chr1	195127569	195127739	5
chr3	95710824	95711024	5
chr11	111758233	111758436	5
chrX	50586265	50586404	5
chr3	151855599	151855732	5
chr16	67346577	67346761	5
chr18	69767137	69767286	5
chr12	82098889	82099060	5
chr4	44708651	44708809	5
chr3	52147586	52147753	5
chr15	103032546	103032699	5
chr14	19019603	19019775	5
chr1	81854023	81854166	5
chr1	4588539	4588750	5
chr6	138864263	138864436	5
chr17	63667535	63667714	5
chr3	35261136	35261329	5
chr8	50526746	50526932	5
chr12	58087040	58087244	5
chr8	110303960	110304157	5
chr12	110778998	110779169	5
chr19	30581170	30581339	5
chr17	25712383	25712580	5
chr2	46404554	46404719	5
chr18	47427323	47427483	5
chr14	47673007	47673143	5
chr15	42473677	42473851	5
chr11	116938571	116938747	5
chr4	72105127	72105305	5
chr5	103237711	103237899	5
chr12	111426430	111426629	5
chr5	8058425	8058594	5
chr18	81188538	81188716	5
chr6	30476370	30476556	5
chr1	77492465	77492655	5
chr6	53906673	53906863	5
chr19	4810659	4810859	5
chr17	44853567	44853754	5
chr13	43998618	43998805	5
chr18	11551526	11551719	5
chr18	56443143	56443331	5
chr2	125242381	125242576	5
chr13	81471064	81471283	5
chr16	40086806	40086998	5
chr4	75650206	75650426	5
chr11	35894735	35894955	5
chr17	51765659	51765847	5
chr1	80707518	80707694	5
chr16	72937297	72937525	5
chr5	113868141	113868345	5
chr12	99303858	99304004	5
chr18	9792951	9793171	5
chr13	73838179	73838355	5
chr10	39249468	39249658	5
chr10	28933202	28933344	5
chr9	46029642	46029839	5
chr13	83589855	83590034	5
chr1	138806583	138806778	5
chr8	110622457	110622630	5
chr12	37448451	37448659	5
chr1	128828271	128828499	5
chr11	102081347	102081560	5
chr3	17519579	17519749	5
chr2	51535481	51535657	5
chr10	44184091	44184270	5
chr11	32057939	32058138	5
chr1	81103904	81104085	5
chr5	51937939	51938158	5
chr18	24578050	24578220	5
chr16	92500534	92500763	5
chr3	150370369	150370560	5
chr5	124482281	124482479	5
chr4	74200350	74200541	5
chr13	27025334	27025482	5
chr2	166192390	166192582	5
chr13	46629561	46629741	5
chr4	93822750	93822936	5
chr6	99005363	99005515	5
chr3	141615182	141615394	5
chr8	28480047	28480238	5
chr11	5171596	5171820	5
chr16	95580794	95580986	5
chr14	73245459	73245646	5
chr6	141179109	141179300	5
chr13	98080735	98080937	5
chr4	84766683	84766893	5
chr17	44395086	44395307	5
chr4	75234309	75234521	5
chr2	167422970	167423185	5
chr3	109787189	109787363	5
chr3	35740420	35740601	5
chr4	76169825	76170024	5
chr9	69372622	69372805	5
chr7	56648784	56649001	5
chr7	78364139	78364289	5
chr11	19613000	19613206	5
chr1	192330009	192330186	5
chr2	114661210	114661433	5
chr16	65675841	65676044	5
chr19	54286676	54286856	5
chr2	59543618	59543775	5
chr8	33713223	33713425	5
chr15	53103268	53103446	5
chr19	45988653	45988812	5
chr14	66368991	66369184	5
chr16	31535392	31535596	5
chrX	39577832	39578029	5
chr12	101527801	101527980	5
chr5	81955069	81955243	5
chr17	29588451	29588670	5
chr9	117144436	117144590	5
chr4	54041738	54041926	5
chr13	29084090	29084330	5
chr18	14766923	14767132	5
chr19	28592554	28592799	5
chr3	147526716	147526895	5
chr19	45138754	45138976	5
chr3	5231648	5231848	5
chr10	16976010	16976235	5
chr3	148655596	148655839	5
chr5	107539698	107539947	5
chr2	8872394	8872640	5
chr17	51781916	51782125	5
chr14	63673654	63673867	5
chr2	62229197	62229380	5
chr15	56201663	56201875	5
chr11	84376314	84376494	5
chr1	14288192	14288424	5
chr9	76020441	76020647	5
chr3	148304378	148304579	5
chr19	19115051	19115269	5
chr1	56208943	56209161	5
chr7	78075835	78076056	5
chr5	120060994	120061197	5
chr16	15948714	15948883	5
chr4	44788044	44788263	5
chr4	32492201	32492402	5
chr4	46273606	46273800	5
chrX	130923998	130924202	5
chr10	40220076	40220272	5
chr1	196848020	196848215	5
chr11	97232147	97232350	5
chr8	49967372	49967567	5
chr6	53614748	53614979	5
chr3	147454150	147454390	5
chr13	54469959	54470131	5
chr4	127793778	127794027	5
chr8	110263448	110263672	5
chr10	67972200	67972401	5
chr4	70643459	70643682	5
chr2	63919712	63919942	5
chr19	59967416	59967635	5
chr6	137893630	137893858	5
chr12	96936220	96936439	5
chrX	49950880	49951050	5
chr15	50987624	50987836	5
chr5	106463074	106463312	5
chr1	137581737	137581943	5
chr15	102826319	102826512	5
chr1	64855043	64855232	5
chr3	16915332	16915570	5
chr11	74982211	74982413	5
chr2	163106393	163106613	5
chr13	78352230	78352470	5
chr18	69584554	69584769	5
chr3	127066498	127066696	5
chr6	53523544	53523774	5
chr4	132047681	132047911	5
chr11	84467208	84467420	5
chr1	41942402	41942629	5
chr16	91293317	91293521	5
chr3	27419448	27419632	5
chr5	111357352	111357563	5
chr5	122398515	122398764	5
chr18	54695539	54695761	5
chr19	38820582	38820823	5
chr2	99683355	99683572	5
chr3	131522175	131522408	5
chr15	40008395	40008607	5
chr13	83885430	83885680	5
chr4	75399943	75400185	5
chr14	13282420	13282633	5
chr2	65754261	65754497	5
chr1	3190650	3190827	5
chr6	144253423	144253637	5
chr11	37422575	37422781	5
chr13	63195664	63195872	5
chr10	50615976	50616156	5
chr2	115869690	115869885	5
chr15	102115454	102115687	5
chr4	84136215	84136418	5
chr12	48501409	48501651	5
chr7	137019975	137020210	5
chr4	84223046	84223233	5
chr6	110945855	110946088	5
chr3	151229694	151229912	5
chr15	6006999	6007214	5
chr4	28538032	28538280	5
chr12	76606319	76606554	5
chr9	114437302	114437550	5
chr2	66018347	66018566	5
chr2	125194298	125194547	5
chr1	195332464	195332696	5
chr2	145687864	145688110	5
chr2	165707757	165707953	5
chr10	119824888	119825075	5
chr2	154247156	154247385	5
chr14	22910555	22910776	5
chr3	3613656	3613872	5
chr16	30009037	30009268	5
chr17	62959044	62959287	5
chr11	19104234	19104484	5
chr11	105620081	105620277	5
chr2	116649846	116650075	5
chr17	15217338	15217571	5
chr2	70281788	70282021	5
chr3	149508286	149508495	5
chr14	67936660	67936858	5
chr9	69518351	69518587	5
chr1	121225385	121225625	5
chr5	75955312	75955539	5
chr11	118946654	118946895	5
chr19	37539483	37539683	5
chr1	69332794	69333014	5
chr2	151660352	151660585	5
chr2	166660255	166660476	5
chr3	45452202	45452414	5
chr3	35219014	35219227	5
chr2	10271884	10272101	5
chr6	98614636	98614853	5
chr18	48013796	48014000	5
chr9	48627739	48627987	5
chr10	37224575	37224820	5
chr5	116356875	116357097	5
chr1	62981125	62981346	5
chr11	36463634	36463851	5
chr4	105802036	105802281	5
chr1	41177688	41177902	5
chr4	97272655	97272880	5
chr1	196546443	196546683	5
chr1	156347731	156347979	5
chr8	111250293	111250540	5
chr7	120831963	120832188	5
chr18	69882622	69882831	5
chr1	62248002	62248195	5
chr12	52605145	52605367	5
chr12	10146798	10147000	5
chr15	49178464	49178712	5
chr14	72231927	72232135	5
chr6	147702334	147702577	5
chr2	133223394	133223625	5
chr8	130712533	130712736	5
chrX	66942814	66943014	5
chr12	80862033	80862254	5
chr5	148075415	148075656	5
chr11	37650889	37651092	5
chr19	36909467	36909662	5
chr4	100095294	100095538	5
chr14	105226676	105226912	5
chr3	155119553	155119776	5
chr1	78169157	78169405	5
chr6	88215889	88216105	5
chr14	106131450	106131688	5
chr6	119399494	119399712	5
chr12	34855049	34855286	5
chr4	73969037	73969283	5
chr11	101150624	101150872	5
chr9	70696050	70696255	5
chr8	117079460	117079700	5
chr4	109917346	109917590	5
chr3	35381416	35381626	5
chr1	192028461	192028709	5
chr3	4901270	4901505	5
chr6	147607474	147607705	5
chr12	107149805	107150011	5
chr19	56722577	56722777	5
chr6	122776047	122776244	5
chr1	14098852	14099089	5
chr3	35021041	35021278	5
chr8	33203755	33203992	5
chr9	112796540	112796785	5
chr19	9064748	9064988	5
chr9	98563369	98563617	5
chr4	87612239	87612481	5
chr18	69620140	69620370	5
chr9	47411615	47411863	5
chr16	97224294	97224540	5
chr18	69514518	69514745	5
chr10	114923087	114923325	5
chr2	70281140	70281381	5
chr3	149233533	149233751	5
chr12	34489236	34489482	5
chr12	109204106	109204317	5
chr8	92927906	92928136	5
chr14	84286779	84287000	5
chr8	101242310	101242556	5
chr12	80534209	80534440	5
chr3	30125995	30126244	5
chr6	135367466	135367680	5
chr9	71081834	71082046	5
chr3	35234720	35234949	5
chr12	80776783	80777009	5
chr14	67944985	67945224	5
chr14	24269368	24269608	5
chr10	93229788	93230015	5
chr1	76539979	76540229	5
chr12	10399826	10400075	5
chr19	55455173	55455423	5
chr17	62813951	62814186	5
chr17	49778480	49778728	5
chr8	117729703	117729949	5
chr18	48009805	48010055	5
chr11	36301201	36301441	5
chr13	44976448	44976686	5
chr11	69183536	69183786	5
chr9	115477140	115477390	5
chr15	48611399	48611641	5
chr15	6187928	6188177	5
chr11	80150009	80150259	5
chr10	87026562	87026812	5
chr12	111724211	111724461	5
chr4	139387175	139387424	5
chr7	56221628	56221876	5
chr6	99204176	99204413	5
chr14	37385583	37385832	5
chr1	14489400	14489648	5
chr10	67680857	67681091	5
chr14	59108139	59108379	5
chr5	145529376	145529621	5
chr11	79241149	79241391	5
chr8	111122642	111122893	5
chr8	109775655	109775906	5
chr3	99923105	99923356	5
chr9	28509570	28509821	5
chr6	32191736	32191987	5
chr2	133199274	133199526	5
chr4	97454223	97454475	5
chr10	44226962	44227214	5
chr13	114668398	114668650	5
chr14	122854336	122854588	5
chr14	117751066	117751318	5
chr6	93184538	93184791	5
chr5	133169497	133169750	5
chr18	21354337	21354590	5
chr11	44713433	44713686	5
chr19	14197973	14198374	5
chr6	52201494	52201749	5
chr12	38198314	38198569	5
chr3	97846708	97846963	5
chr10	30901741	30901996	5
chr2	33733957	33734213	5
chr2	169784897	169785153	5
chr15	102318925	102319182	5
chr2	42485449	42485706	5
chr14	49178187	49178444	5
chr16	93487737	93487994	5
chr12	73950907	73951164	5
chr10	117342759	117343016	5
chr3	35141348	35141606	5
chr3	150273678	150273936	5
chr2	167593538	167593797	5
chr10	41790457	41790716	5
chr14	122870321	122870581	5
chr12	109249029	109249289	5
chr11	84490186	84490447	5
chr2	75153608	75153869	5
chr10	125977435	125977696	5
chr2	7157198	7157459	5
chr16	66377252	66377513	5
chr19	14498911	14499172	5
chr8	110176259	110176520	5
chr9	47442784	47443045	5
chr5	122374514	122374775	5
chr4	28368548	28368810	5
chr13	29865650	29865912	5
chr5	64857581	64857843	5
chr2	9817616	9817878	5
chr10	96189850	96190112	5
chr8	129989406	129989668	5
chr18	68897299	68897561	5
chr17	83692205	83692467	5
chrX	11155376	11155639	5
chr3	52106960	52107223	5
chr14	106084145	106084408	5
chr9	72673554	72673817	5
chr6	49636991	49637254	5
chr3	17697810	17698073	5
chr11	96599333	96599597	5
chr14	48915377	48915641	5
chr12	108297990	108298254	5
chr7	103796177	103796442	5
chr11	110263577	110263842	5
chr9	120491048	120491313	5
chr11	65300382	65300647	5
chr13	105837471	105837736	5
chr5	137048433	137048699	5
chr3	49911828	49912094	5
chr8	87230069	87230335	5
chr2	45143752	45144019	5
chr17	28266049	28266316	5
chr3	16823120	16823387	5
chr16	24231557	24231824	5
chr1	128366680	128366947	5
chr9	24778607	24779009	5
chr14	29808985	29809387	5
chr5	101461994	101462262	5
chr7	80559219	80559488	5
chr12	90830751	90831020	5
chr4	82903961	82904230	5
chr18	69819825	69820094	5
chr4	18226471	18226740	5
chr6	4433709	4433978	5
chr3	34409328	34409597	5
chr11	24233344	24233613	5
chr11	55401264	55401534	5
chr13	48428066	48428336	5
chr2	57447578	57447848	5
chr5	147494496	147494766	5
chr19	53579851	53580121	5
chr12	47409027	47409297	5
chr6	98968552	98968822	5
chr15	68625636	68625906	5
chr12	105888850	105889120	5
chr18	14645680	14645950	5
chr13	46187946	46188216	5
chr10	23208741	23209012	5
chr18	79034501	79034772	5
chr15	51315616	51315887	5
chr18	58202544	58202815	5
chr19	55672146	55672418	5
chr2	137515163	137515435	5
chr18	57222446	57222718	5
chr8	79007036	79007309	5
chr14	99880331	99880604	5
chr5	133375157	133375431	5
chr8	111982403	111982677	5
chr3	115345401	115345675	5
chr18	27864092	27864366	5
chr9	69213734	69214008	5
chr12	57097753	57098027	5
chr12	72359513	72359787	5
chr1	97141688	97141962	5
chr10	94818897	94819171	5
chr9	32693682	32693957	5
chr3	128377293	128377568	5
chr13	32293912	32294187	5
chr5	134193762	134194037	5
chr18	13857376	13857652	5
chr6	51098110	51098386	5
chr1	75927793	75928069	5
chr1	180530752	180531028	5
chr6	93185918	93186194	5
chr4	139380301	139380577	5
chr17	67264374	67264650	5
chr2	44944598	44944875	5
chr10	49206723	49207000	5
chr17	73436144	73436421	5
chr10	115254884	115255161	5
chr6	143655013	143655290	5
chr6	84465442	84465719	5
chr16	63861339	63861617	5
chr6	101329802	101330080	5
chr1	15529819	15530097	5
chr14	63925770	63926048	5
chr12	54748843	54749121	5
chr1	120701196	120701475	5
chr6	98696843	98697122	5
chr17	51502022	51502301	5
chr10	94405021	94405300	5
chr6	84651449	84651728	5
chr17	45238321	45238600	5
chr6	17512339	17512618	5
chr10	39240095	39240374	5
chr13	91583617	91583896	5
chr11	24336233	24336513	5
chr11	74844823	74845103	5
chr2	163104092	163104372	5
chr16	74324885	74325165	5
chr11	77820936	77821216	5
chr13	42613980	42614260	5
chr14	22856805	22857085	5
chr4	3863390	3863794	5
chr1	62062975	62063256	5
chr14	23618895	23619176	5
chr9	112089356	112089637	5
chr6	8608654	8608936	5
chr9	47421055	47421337	5
chr11	96503896	96504178	5
chr3	99063208	99063490	5
chr14	10606099	10606382	5
chr4	134722359	134722642	5
chr2	135397088	135397371	5
chr4	75661342	75661625	5
chr5	76315679	76315962	5
chr13	42660639	42660922	5
chr16	51759192	51759476	5
chr8	59311621	59311905	5
chr10	90744568	90744852	5
chr3	72851674	72851958	5
chr10	91539129	91539413	5
chr14	26352727	26353011	5
chr4	104150771	104151055	5
chr18	16454669	16454953	5
chr3	5216940	5217225	5
chr2	51140479	51140764	5
chr10	29431347	29431632	5
chr3	128494793	128495079	5
chr3	97743640	97743926	5
chr12	80473893	80474179	5
chr13	120022778	120023064	5
chr2	167365712	167365998	5
chr10	97880836	97881123	5
chr1	192217100	192217387	5
chr5	74719647	74719934	5
chr11	89332483	89332770	5
chr6	39674809	39675097	5
chr8	94516929	94517217	5
chr11	69178483	69178771	5
chr6	101504743	101505031	5
chr18	16576768	16577056	5
chr13	103651513	103651801	5
chr13	46666942	46667230	5
chr9	61173702	61173991	5
chr11	44784480	44784769	5
chr6	146138527	146138816	5
chr18	38654196	38654485	5
chr1	61219453	61219742	5
chrX	77779542	77779831	5
chr18	12182613	12182902	5
chr18	55006625	55006914	5
chr14	14115636	14115925	5
chr11	18800449	18800855	5
chr19	56152108	56152514	5
chr15	35797460	35797750	5
chr19	55254864	55255154	5
chr18	52908076	52908366	5
chr9	69819589	69819879	5
chr9	66929432	66929723	5
chr15	53103618	53103910	5
chr9	101316051	101316343	5
chr10	104721485	104721777	5
chr17	84713415	84713707	5
chr5	147930667	147930959	5
chr2	44423200	44423492	5
chr11	44763056	44763349	5
chr17	61250888	61251181	5
chr2	128113800	128114093	5
chr16	74644839	74645133	5
chr2	140834163	140834457	5
chr16	40191299	40191593	5
chr16	23991416	23991710	5
chr4	83675569	83675864	5
chr5	64896788	64897084	5
chr6	84606627	84606923	5
chr9	100268207	100268503	5
chr5	76343254	76343662	5
chr13	117527390	117527798	5
chr13	105417746	105418043	5
chr8	49776227	49776524	5
chr14	46793749	46794046	5
chr9	101832442	101832739	5
chr10	22541223	22541521	5
chr2	35471638	35471936	5
chr13	40740864	40741162	5
chr19	59942431	59942729	5
chr6	118682478	118682776	5
chr2	168588158	168588456	5
chr1	20493330	20493628	5
chr12	16538855	16539153	5
chr10	86700033	86700332	5
chr7	122352063	122352362	5
chr3	42549922	42550221	5
chr18	72713662	72714071	5
chr5	76296823	76297232	5
chr18	55139794	55140094	5
chr10	84193673	84193973	5
chr4	100036705	100037005	5
chr13	110232532	110232832	5
chr12	72669285	72669586	5
chr6	5344914	5345215	5
chr6	99467293	99467594	5
chr13	114944367	114944668	5
chr8	94642344	94642646	5
chr2	48536097	48536399	5
chr1	62566869	62567171	5
chr4	82162901	82163203	5
chr5	119505485	119505788	5
chr11	17206201	17206504	5
chr5	117307253	117307556	5
chr11	95575021	95575431	5
chr2	70310098	70310508	5
chr2	31392255	31392665	5
chr3	150888811	150889115	5
chr10	67603766	67604070	5
chr11	89409375	89409679	5
chr15	102940455	102940759	5
chr19	58214621	58214925	5
chr2	30422960	30423265	5
chr7	106623429	106623734	5
chr5	120859599	120859904	5
chr3	98947593	98947899	5
chr2	160544733	160545039	5
chr6	70917156	70917462	5
chr19	28331270	28331576	5
chr4	64787865	64788171	5
chr6	98223767	98224073	5
chr3	5209072	5209378	5
chrX	59725703	59726010	5
chr1	188539208	188539515	5
chr4	72526841	72527148	5
chr4	115570726	115571033	5
chr11	54410712	54411019	5
chr12	6645145	6645452	5
chr13	40544888	40545196	5
chr1	123288973	123289281	5
chr8	130937786	130938094	5
chr5	51729342	51729650	5
chr5	99252178	99252486	5
chr10	95236453	95236762	5
chr11	26675354	26675663	5
chr8	101714563	101714872	5
chr18	10450836	10451145	5
chr5	42556152	42556461	5
chr6	11556581	11556890	5
chr8	129061081	129061391	5
chr1	77711213	77711523	5
chr5	132148818	132149128	5
chr3	118255709	118256019	5
chr4	153845609	153845919	5
chr2	75867580	75867890	5
chr5	134825296	134825607	5
chr6	99044516	99044827	5
chr19	37508219	37508530	5
chr12	72613553	72613864	5
chr10	30495813	30496124	5
chr3	150022390	150022803	5
chr4	150178002	150178415	5
chr7	77837229	77837541	5
chr8	79427242	79427554	5
chr15	40185961	40186273	5
chr13	39090876	39091188	5
chr11	25896783	25897095	5
chr7	83583350	83583662	5
chr8	123406943	123407255	5
chr13	39663293	39663605	5
chr18	54251827	54252139	5
chr6	15235191	15235504	5
chr15	40786893	40787206	5
chr10	96148674	96148987	5
chr16	66592299	66592612	5
chr5	122517720	122518033	5
chr8	101641552	101641865	5
chr1	13484602	13484916	5
chr2	85079190	85079504	5
chr1	78426750	78427064	5
chr9	43943699	43944013	5
chr8	110854915	110855229	5
chr3	156455251	156455565	5
chr4	48068251	48068565	5
chr2	168496882	168497196	5
chr9	122576221	122576535	5
chr18	29792608	29793022	5
chr12	35391784	35392198	5
chr8	110613493	110613808	5
chr14	104176968	104177283	5
chr9	117550649	117550964	5
chr15	35632860	35633175	5
chr17	62732853	62733168	5
chr1	16105432	16105748	5
chr9	87963858	87964174	5
chr13	56212338	56212654	5
chr11	45052808	45053124	5
chr14	29626799	29627115	5
chr15	3657167	3657483	5
chr10	49266856	49267172	5
chr1	69733435	69733850	5
chr6	144004984	144005399	5
chr18	36580798	36581213	5
chr1	17541676	17541993	5
chr13	83739983	83740300	5
chr13	95438290	95438607	5
chr14	115276817	115277134	5
chr8	66798195	66798513	5
chr4	17781740	17782058	5
chr4	23526623	23526941	5
chr10	50578309	50578627	5
chr1	191931078	191931397	5
chr3	141981993	141982312	5
chr4	95282353	95282672	5
chr5	52210326	52210645	5
chr18	6884711	6885030	5
chr10	15112828	15113148	5
chr1	99983296	99983616	5
chr2	162693083	162693403	5
chr1	67686820	67687140	5
chr1	77381842	77382162	5
chr17	75455985	75456305	5
chr15	13268395	13268716	5
chr18	14179672	14179993	5
chr4	8881765	8882086	5
chr14	76840204	76840525	5
chr2	12949567	12949888	5
chr7	122679917	122680334	5
chr5	119839651	119840068	5
chr4	53809892	53810309	5
chr6	53582329	53582651	5
chr7	37725346	37725668	5
chr1	188091306	188091628	5
chr5	67327886	67328208	5
chr8	59731076	59731398	5
chr15	51333916	51334238	5
chr1	64970901	64971223	5
chr16	74312957	74313279	5
chr19	44774876	44775199	5
chr14	29232592	29232915	5
chr5	119279331	119279654	5
chr5	81504366	81504689	5
chr18	72232351	72232675	5
chr6	59948516	59948840	5
chr16	57532409	57532733	5
chr5	65109983	65110307	5
chr9	68989410	68989734	5
chr18	66338007	66338332	5
chr4	22854286	22854611	5
chr2	44739064	44739389	5
chr9	23159168	23159493	5
chr3	128426095	128426420	5
chr4	92512637	92512962	5
chr14	23868522	23868847	5
chrX	46339012	46339337	5
chr3	127328547	127328966	5
chr12	54163701	54164027	5
chr18	43037420	43037746	5
chr4	72317797	72318123	5
chr9	117198204	117198531	5
chr13	48480763	48481090	5
chr2	57753157	57753484	5
chr4	72607234	72607561	5
chr14	71672492	71672820	5
chr5	6945441	6945769	5
chr11	18810804	18811224	5
chr14	98569317	98569646	5
chr18	31943397	31943726	5
chr17	63495896	63496225	5
chr14	13287961	13288290	5
chr19	37712557	37712886	5
chr15	40718268	40718597	5
chr5	111686186	111686515	5
chr9	16446378	16446708	5
chr4	117236284	117236614	5
chr8	118582827	118583157	5
chr5	147945569	147945899	5
chr1	188055046	188055376	5
chr11	110562446	110562776	5
chr2	17971071	17971401	5
chr8	102271043	102271373	5
chr15	32878215	32878545	5
chr8	118609411	118609741	5
chr8	110357262	110357592	5
chr1	82109154	82109484	5
chr11	24000215	24000546	5
chr2	115750389	115750720	5
chr7	26099940	26100271	5
chr17	15950697	15951028	5
chr14	49234644	49234975	5
chr9	107568918	107569249	5
chr19	28757130	28757461	5
chr16	5898627	5898958	5
chr12	57899799	57900131	5
chr8	91765937	91766269	5
chr14	13317667	13317999	5
chr2	115701527	115701859	5
chr14	22892902	22893234	5
chr4	119517050	119517382	5
chr18	6836258	6836590	5
chr2	125241679	125242101	5
chr10	68996037	68996370	5
chr12	49622827	49623160	5
chr10	60415382	60415715	5
chr16	44140498	44140831	5
chr9	13412193	13412526	5
chr12	52052212	52052545	5
chr18	57302687	57303020	5
chr19	42483815	42484149	5
chr6	102430263	102430597	5
chr12	104811501	104811835	5
chr9	87204741	87205164	5
chr9	56920771	56921194	5
chr3	153994570	153994993	5
chr2	48280869	48281204	5
chr19	22519946	22520281	5
chr14	63681268	63681603	5
chr8	110484930	110485265	5
chr16	29169414	29169749	5
chr5	41471460	41471795	5
chr18	25792862	25793197	5
chr8	93806525	93806860	5
chr14	87660051	87660387	5
chr13	110276722	110277059	5
chr8	9030241	9030578	5
chr1	73317284	73317621	5
chr3	99056761	99057099	5
chr4	55084250	55084588	5
chr18	15003835	15004173	5
chr11	85338827	85339165	5
chr4	32499064	32499402	5
chr8	111122948	111123373	5
chr15	90508979	90509318	5
chr13	31648833	31649172	5
chr4	70964557	70964896	5
chr3	34342757	34343096	5
chr3	5265866	5266205	5
chr13	16927111	16927450	5
chr16	39110278	39110617	5
chr10	24117940	24118280	5
chr7	119984597	119984937	5
chr10	95216257	95216597	5
chr2	66470636	66470976	5
chr4	83962018	83962444	5
chr8	94660355	94660781	5
chr4	29066174	29066515	5
chr14	120724736	120725077	5
chr4	123639821	123640162	5
chr11	95537716	95538057	5
chr19	58629324	58629665	5
chr4	65192869	65193378	5
chr14	29268005	29268347	5
chr17	16997909	16998251	5
chr10	36411372	36411714	5
chr11	85547561	85547988	5
chr12	107547113	107547456	5
chr6	54171276	54171619	5
chr11	32863668	32864011	5
chr2	14794869	14795213	5
chr13	28721867	28722211	5
chr2	103810059	103810403	5
chr4	150643091	150643435	5
chr6	63566529	63566957	5
chr10	67598628	67599104	5
chr9	98525124	98525469	5
chr11	63432143	63432488	5
chr14	75949746	75950091	5
chr17	77993293	77993638	5
chr9	116032041	116032386	5
chr12	12821370	12821716	5
chr11	24067641	24067987	5
chr12	9950264	9950610	5
chrX	11665214	11665560	5
chr13	102583174	102583520	5
chr9	68123308	68123655	5
chr3	143230805	143231152	5
chr12	6132924	6133272	5
chr5	107009917	107010265	5
chr1	64112510	64112858	5
chr14	49143888	49144237	5
chr2	74927822	74928171	5
chr10	66385256	66385605	5
chr2	9345264	9345613	5
chrX	10976817	10977166	5
chr12	80699665	80700014	5
chr13	28782585	28782934	5
chr4	82153210	82153641	5
chr17	16035454	16035885	5
chr10	122299277	122299708	5
chr10	67585144	67585494	5
chr3	145461673	145462023	5
chr4	8036949	8037299	5
chr14	62675987	62676337	5
chr15	97744124	97744474	5
chr13	108609298	108609649	5
chr14	62648739	62649090	5
chr8	91803617	91803968	5
chr15	35991069	35991420	5
chr2	106716770	106717121	5
chr12	3784846	3785278	5
chr10	67654872	67655304	5
chr3	18060803	18061155	5
chr17	59409166	59409518	5
chr2	68258051	68258403	5
chr11	18645687	18646039	5
chr10	125875760	125876113	5
chr13	110853317	110853670	5
chr5	58512890	58513243	5
chr3	39119304	39119657	5
chr6	5821033	5821386	5
chr12	52075648	52076002	5
chr1	57091292	57091646	5
chr4	13505025	13505380	5
chr12	86912352	86912707	5
chr1	15125255	15125610	5
chr5	51050397	51050752	5
chrX	45363282	45363637	5
chr1	163937212	163937567	5
chr13	120149169	120149524	5
chr14	32670531	32670886	5
chr3	34787238	34787594	5
chr3	35304635	35304991	5
chr5	67297078	67297434	5
chr2	165705882	165706238	5
chr10	42795151	42795507	5
chr9	68116218	68116574	5
chrX	45637741	45638097	5
chr12	34647892	34648327	5
chr6	103010276	103010633	5
chr8	33994996	33995353	5
chr5	68024560	68024917	5
chr10	120135275	120135632	5
chr16	63653487	63653844	5
chr10	31327258	31327616	5
chr17	44522839	44523197	5
chr3	65701364	65701722	5
chr10	93557210	93557568	5
chr4	100379727	100380085	5
chr8	45459467	45459903	5
chr11	57654726	57655085	5
chr13	20181962	20182321	5
chr3	30034252	30034611	5
chr3	145391210	145391570	5
chr6	52214323	52214683	5
chr17	35839018	35839378	5
chr10	106935384	106935744	5
chr8	49408192	49408552	5
chr6	50623624	50624061	5
chr1	191975432	191975869	5
chr7	37117764	37118125	5
chr5	102072544	102072905	5
chr11	98801420	98801781	5
chr1	139566468	139566829	5
chr8	91558268	91558629	5
chr11	25986382	25986743	5
chr5	123069761	123070122	5
chr14	10388650	10389011	5
chr8	117531981	117532342	5
chr1	41277531	41277892	5
chr16	70776231	70776593	5
chr4	10749011	10749373	5
chr13	44597811	44598173	5
chr9	68646750	68647112	5
chr7	104223662	104224024	5
chr6	78200065	78200427	5
chr6	144848332	144848695	5
chr11	77720103	77720466	5
chrX	102962609	102962972	5
chr1	42557031	42557394	5
chr19	46946630	46946993	5
chr4	47797900	47798263	5
chr18	28551461	28551824	5
chr13	78323188	78323627	5
chr16	85878361	85878725	5
chr15	7515340	7515704	5
chr2	37441369	37441733	5
chr6	51807085	51807449	5
chr4	74666977	74667341	5
