# Supplementary material for: Automated Discovery of Tissue-Targeting Enhancers and Transcription Factors from Binding Motif and Gene Function Data
Source: PLOS journal article supplement (doi:10.1371/journal.pcbi.1003449), 2014-01-30
Supplement: S22 (10.1371/journal.pcbi.1003449.s022) [file journal.pcbi.1003449.s022]

## Sheet: Liver TFs and TFBS Clusters
Liver TFBS clusters					Top 50 TFs
mm9 Chromosome	Start	End	# TFBS in cluster		Rank	Motif Name	Possible TF
chr17	26634281	26634665	9		1	J_RELA	Rela
chr17	34258798	34259099	8		2	G_HIVEP1_01	Hivep1
chr1	157081078	157081449	7		3	V_STAT5B_01	Stat5b
chr4	119949896	119950099	7		4	G_SPI1_PU1_01	Sfpi1
chr16	24629413	24629618	7		5	B_Gata6_primary	Gata6
chr8	122940204	122940447	7		6	L_ERG_ERG_01	Erg
chr19	5432033	5432291	7		7	W_JUN_01	Jun
chr3	87596710	87596978	7		8	V_GLI1_01	Gli
chr11	98609237	98609535	7		9	B_Fli1_01	Fli1
chr2	27427910	27428218	7		10	W_Zscan10_01	Zscan10
chr7	152370818	152371144	7		11	B_Tcfap2e_primary	Tcfap2e
chr6	91691300	91691638	7		12	J_TLX1_NFIC	Tlx1
chr5	123578751	123579112	6		13	J_RUNX1	Runx1
chr8	92605960	92606333	6		14	J_NFE2L2	Nfe2l2
chr5	140386123	140386507	6		15	B_Irf3_primary	Irf3
chr10	87328592	87328714	6		16	W_Mycn	Mycn
chr12	10189534	10189718	6		17	V_CP2_01	Tcfcp2
chr12	70639107	70639274	6		18	B_Rxra_primary	Rxra
chr4	106520535	106520701	6		19	V_IK3_01	Ikzf3
chr5	115852125	115852310	6		20	L_NFATC1_NFATC1_02	Nfatc1
chr8	118620638	118620839	6		21	L_TCF4_TCF4_01	Tcf4
chr11	78209827	78210015	6		22	V_RBPJK_01	Rbpj
chr4	136765040	136765252	6		23	L_HSF2_HSF2_01	Hsf2
chr2	164880616	164880825	6		24	B_Irf5_primary	Irf5
chr4	94945182	94945414	6		25	V_PPAR_DR1_Q2	Pparg
chr9	20787531	20787727	6		26	G_HPF1_01	Znf83
chr15	89000684	89000861	6		27	G_SIX_01	Six
chr2	151946674	151946878	6		28	V_ZNF515_01	Glis3
chr15	76023267	76023463	6		29	V_HEN1_02	Nhlh1
chr2	130916705	130916931	6		30	V_VJUN_01	Jun
chr11	117793680	117793857	6		31	B_Zbtb7b_secondary	Zbtb7b
chr13	16926984	16927177	6		32	B_Pitx3_3497_2	Pitx3
chr9	60864547	60864764	6		33	B_Smad3_primary	Smad3
chr6	86497946	86498190	6		34	V_PAX4_01	Pax4
chr17	28478026	28478243	6		35	V_HTF_01	Xbp1
chr8	123545343	123545551	6		36	B_Zic2_primary	Zic2
chr7	20041538	20041764	6		37	V_NF1	Nfic
chr10	18729108	18729343	6		38	W_Carf_01	Carf
chr3	87712807	87713043	6		39	V_P53_03	Trp53
chr11	98275462	98275702	6		40	B_Plagl1_secondary	Plagl1
chr13	55629922	55630163	6		41	G_E2F1_DP1_01	E2f1
chr4	151524640	151524891	6		42	V_HMX1_01	Hmx1
chr16	76225467	76225719	6		43	J_ESR2	Esr2
chr13	55265090	55265343	6		44	W_Prdm11_01	Prdm11
chr9	63942143	63942532	6		45	G_RAR_RXR_02	Rxra
chr1	42691445	42691704	6		46	V_PPARA_02	Ppara
chr12	12911404	12911663	6		47	J_RXR_RAR_DR5	Rxr
chr4	124344806	124345067	6		48	W_Zscan20_01	Zscan20
chr11	98628266	98628529	6		49	J_PLAG1	Plag1
chr14	122412813	122413080	6		50	G_MARE_ARE_01	Mafb
chr3	90392233	90392507	6
chr11	5045687	5045962	6
chr13	38215608	38215883	6
chr2	28390398	28390681	6
chr11	70046197	70046481	6
chr4	136754053	136754341	6
chr10	93103462	93103750	6
chr6	29386019	29386414	6
chr8	123786732	123787024	6
chr2	165060250	165060542	6
chr5	119682976	119683269	6
chr3	37628020	37628315	6
chr2	126440427	126440723	6
chr12	86838762	86839059	6
chr3	30974801	30975099	6
chr18	68750125	68750430	6
chr11	98802573	98802881	6
chr4	130434846	130435155	6
chr4	114469777	114470086	6
chr15	87179850	87180162	6
chr17	56432776	56433088	6
chr11	111646154	111646467	6
chr2	152630184	152630497	6
chr11	34223829	34224144	6
chr9	32532747	32533062	6
chr11	69178481	69178796	6
chr16	85800938	85801253	6
chr14	56442141	56442457	6
chr11	101676970	101677288	6
chr12	87378264	87378588	6
chr13	63629755	63630079	6
chr5	104189656	104189982	6
chr18	35994333	35994660	6
chr14	68160184	68160513	6
chr16	4594038	4594368	6
chr13	48641061	48641395	6
chr2	151850593	151850928	6
chr18	14179575	14179911	6
chr6	58974498	58974834	6
chr14	63985524	63985861	6
chr4	138709930	138710274	6
chr11	120118357	120118702	6
chr17	45729870	45730218	6
chrX	11700255	11700678	6
chr15	79782451	79782806	5
chr8	90357995	90358350	5
chr17	27698798	27699266	5
chr17	56901462	56901832	5
chr5	137551575	137551947	5
chr11	4179931	4180303	5
chr19	47402341	47402776	5
chr9	64950398	64950771	5
chr2	31204064	31204437	5
chr12	106039740	106040116	5
chr8	87504694	87505071	5
chr8	123839948	123840325	5
chr4	137043492	137043870	5
chr8	87506134	87506575	5
chr11	88177011	88177393	5
chr8	123522827	123523210	5
chr10	13684338	13684722	5
chr12	8393345	8393729	5
chr2	181206852	181207237	5
chr5	135583914	135584299	5
chr11	72767088	72767475	5
chr1	73875671	73876060	5
chr19	9067364	9067811	5
chr2	151908547	151908994	5
chr19	53155287	53155677	5
chr4	136783305	136783696	5
chr8	74854914	74855306	5
chrX	50405706	50406098	5
chr10	37058226	37058619	5
chr1	188310061	188310457	5
chr10	66385256	66385654	5
chr11	100512550	100512948	5
chr9	65518956	65519356	5
chr17	45397439	45397500	5
chr4	155570399	155570505	5
chr5	118338135	118338223	5
chr5	23931895	23931993	5
chr12	114503392	114503498	5
chr2	167686126	167686258	5
chr11	18870090	18870217	5
chr7	19798875	19798996	5
chr1	14700536	14700639	5
chr7	122768842	122768958	5
chr15	79891701	79891809	5
chr10	110981166	110981287	5
chr2	27584196	27584303	5
chr1	120608327	120608461	5
chr18	38159149	38159279	5
chr7	31699941	31700083	5
chr8	116500790	116500932	5
chr16	78376118	78376258	5
chr8	3625546	3625669	5
chr13	46822495	46822652	5
chr10	60281408	60281553	5
chr13	16809264	16809398	5
chr12	72399268	72399400	5
chr18	40342147	40342266	5
chr10	3335748	3335870	5
chr3	52204256	52204373	5
chr19	4155013	4155160	5
chr9	115454964	115455110	5
chr2	32590524	32590661	5
chr14	32482513	32482645	5
chr5	151912422	151912547	5
chr10	18765912	18766066	5
chr14	69898909	69899067	5
chr8	77613550	77613738	5
chr4	132581211	132581399	5
chr5	120254483	120254631	5
chr13	55586013	55586193	5
chr17	35336006	35336200	5
chr5	113580611	113580746	5
chr9	45108635	45108811	5
chr1	60815119	60815259	5
chr7	87352429	87352630	5
chr4	153767618	153767779	5
chrX	58049378	58049530	5
chr2	177876451	177876601	5
chr5	143556427	143556589	5
chr9	60833778	60833924	5
chr17	44573642	44573778	5
chr11	94854314	94854462	5
chr15	98864057	98864217	5
chr11	94995714	94995880	5
chr1	46910688	46910839	5
chr12	114162467	114162635	5
chr9	44303740	44303943	5
chr8	125223103	125223277	5
chr17	16355659	16355835	5
chr4	148160195	148160371	5
chr10	60870759	60870915	5
chr17	43012592	43012797	5
chr17	25312551	25312760	5
chr15	99501823	99502007	5
chr19	53511806	53512001	5
chr4	132593448	132593658	5
chr2	173099989	173100185	5
chr19	59765220	59765413	5
chr19	28825672	28825850	5
chr7	77433182	77433381	5
chr5	75173459	75173640	5
chr9	110776921	110777098	5
chr15	82049366	82049546	5
chr8	123839571	123839806	5
chr15	83621668	83621896	5
chr2	153761243	153761450	5
chr7	51788292	51788474	5
chr16	92948863	92949038	5
chr16	4605619	4605836	5
chr2	158945449	158945618	5
chr2	147013809	147013995	5
chr1	130618694	130618914	5
chr16	18609309	18609512	5
chr8	26254652	26254843	5
chr16	24160941	24161133	5
chr6	100251728	100251919	5
chr11	100490548	100490702	5
chr2	155568768	155568976	5
chr10	66383225	66383441	5
chr3	89200012	89200220	5
chr7	118092062	118092244	5
chr3	145391348	145391574	5
chr15	59248196	59248395	5
chr11	116509782	116510024	5
chrX	165709186	165709392	5
chr10	129719318	129719518	5
chr5	137563359	137563579	5
chr11	97267979	97268157	5
chr19	6164271	6164457	5
chr3	9246164	9246366	5
chr9	107567568	107567782	5
chr2	154247159	154247385	5
chr13	44755183	44755390	5
chr1	187027765	187027998	5
chr10	117856208	117856427	5
chr11	33046197	33046423	5
chr5	115885219	115885438	5
chr7	37743165	37743379	5
chr9	107597871	107598085	5
chr9	44291828	44292008	5
chrX	45359354	45359584	5
chr10	127040359	127040561	5
chr12	56425928	56426122	5
chr11	94998645	94998858	5
chr11	72282760	72282994	5
chr10	12608246	12608490	5
chrX	45609903	45610104	5
chr3	143577840	143578048	5
chr18	61820005	61820191	5
chr1	194367906	194368110	5
chr9	47431907	47432119	5
chr15	79054202	79054444	5
chr9	44334648	44334883	5
chr11	69831887	69832090	5
chr2	71461078	71461323	5
chr1	58561800	58561981	5
chr18	34831493	34831692	5
chr7	77659523	77659739	5
chr9	118180781	118180988	5
chr12	12824118	12824320	5
chrX	83021260	83021502	5
chr6	115955659	115955866	5
chr10	42260374	42260602	5
chr15	85355157	85355394	5
chr12	110773435	110773634	5
chr18	49718653	49718887	5
chr2	154285625	154285835	5
chr2	32570504	32570726	5
chr17	62767104	62767322	5
chr4	132730184	132730422	5
chr7	152149942	152150175	5
chr6	29382792	29383018	5
chr3	136388175	136388395	5
chr6	124812639	124812854	5
chr2	153024245	153024460	5
chr9	116055623	116055859	5
chr2	165388917	165389138	5
chr11	98803445	98803684	5
chr4	43535096	43535327	5
chr8	74247027	74247251	5
chr17	50344737	50344977	5
chr2	167653834	167654069	5
chr12	108420178	108420390	5
chr16	36643880	36644096	5
chr11	56827113	56827360	5
chr4	153798950	153799195	5
chr5	111837907	111838146	5
chr4	82268391	82268630	5
chr2	93512048	93512280	5
chr17	56613935	56614167	5
chr6	84459496	84459719	5
chr3	95490902	95491143	5
chr14	69707360	69707610	5
chr3	95119713	95119951	5
chr5	54335957	54336189	5
chr17	56377254	56377494	5
chrX	50266536	50266776	5
chr11	53441081	53441325	5
chr2	90507994	90508237	5
chr1	139823578	139823816	5
chr7	26034321	26034563	5
chr17	26651605	26651854	5
chr6	98749369	98749614	5
chr18	60788192	60788433	5
chr12	12534718	12534970	5
chr16	31535344	31535596	5
chr10	126968726	126968978	5
chr6	31038731	31038983	5
chr11	95478086	95478339	5
chrX	16661068	16661322	5
chr9	59571657	59571912	5
chr5	23858546	23858801	5
chr16	18460129	18460385	5
chr2	119129493	119129750	5
chr2	32586519	32586776	5
chr5	135348386	135348643	5
chr2	165595015	165595273	5
chr15	83556185	83556443	5
chr2	28771997	28772256	5
chr10	13685275	13685534	5
chr15	7167127	7167387	5
chr8	107870548	107870809	5
chr17	35834734	35834995	5
chr5	137755483	137755745	5
chr19	4081453	4081715	5
chr12	109094750	109095012	5
chr5	18734004	18734266	5
chr5	118229255	118229518	5
chr5	122283902	122284165	5
chr10	99018794	99019058	5
chr19	47513043	47513307	5
chr18	84758910	84759174	5
chr10	43389255	43389520	5
chr2	31385841	31386107	5
chr2	172608305	172608571	5
chr6	144848431	144848697	5
chr2	167874655	167874921	5
chr15	51315621	51315887	5
chr11	94790202	94790469	5
chr11	69231200	69231468	5
chr5	92649413	92649683	5
chr3	21817464	21817734	5
chrX	131135963	131136233	5
chr11	101829700	101829971	5
chr9	43581686	43581957	5
chr15	102237258	102237529	5
chr10	27833766	27834038	5
chr7	124606136	124606409	5
chr12	102106305	102106578	5
chr12	95913327	95913601	5
chr5	120145960	120146234	5
chr11	97424889	97425164	5
chr18	75654760	75655036	5
chr19	55940322	55940598	5
chr14	79557361	79557638	5
chr2	180625236	180625513	5
chr12	13157746	13158024	5
chr14	14900697	14900976	5
chr8	89411718	89411998	5
chr3	96992938	96993219	5
chr2	104930219	104930500	5
chr4	128393078	128393359	5
chr14	71039983	71040266	5
chr4	136745099	136745382	5
chr18	77971718	77972002	5
chr5	119750901	119751185	5
chr4	116948955	116949239	5
chr2	172639495	172639780	5
chr17	86166045	86166330	5
chr14	9146268	9146553	5
chr10	85788049	85788335	5
chr14	26371236	26371522	5
chr9	64584496	64584782	5
chr8	94239972	94240259	5
chr11	102498324	102498611	5
chr15	102813305	102813592	5
chr2	75525428	75525716	5
chr17	49971051	49971339	5
chr8	123906817	123907106	5
chr11	115963390	115963679	5
chr9	44537036	44537325	5
chr17	25568384	25568790	5
chr10	126776486	126776776	5
chr3	114606941	114607231	5
chr10	83551967	83552257	5
chr13	115248985	115249275	5
chr1	64352187	64352479	5
chr3	89188300	89188592	5
chr8	32483844	32484136	5
chr15	79878548	79878840	5
chr2	164282205	164282497	5
chr13	56702541	56702834	5
chr12	78847316	78847609	5
chr10	126625101	126625395	5
chr4	125932250	125932544	5
chr11	84536455	84536749	5
chr17	51550367	51550662	5
chr11	100712223	100712683	5
chrX	12043528	12043824	5
chr4	128925056	128925352	5
chr6	84454549	84454845	5
chr15	103013035	103013331	5
chr13	38819737	38820033	5
chr7	53123477	53123773	5
chr2	167368606	167369014	5
chr2	130463862	130464159	5
chr12	25874002	25874299	5
chr13	99585489	99585786	5
chr9	7670603	7670901	5
chr13	63713358	63713656	5
chrX	136406219	136406517	5
chr17	26640001	26640300	5
chr10	107124581	107124880	5
chr15	77630904	77631203	5
chr11	98320257	98320666	5
chr7	109378890	109379190	5
chr6	28083970	28084270	5
chr16	50429508	50429809	5
chr2	181412500	181412802	5
chr8	97438605	97438907	5
chr9	65112654	65112957	5
chr15	76026863	76027273	5
chr2	164266647	164266951	5
chr7	20416122	20416426	5
chr15	101772388	101772692	5
chr7	134889889	134890193	5
chr3	89191862	89192167	5
chr9	118279950	118280255	5
chr11	111519873	111520179	5
chr1	152872203	152872509	5
chr8	86525211	86525517	5
chr1	179553523	179553829	5
chr4	10437084	10437391	5
chr11	110372487	110372795	5
chr17	87075780	87076089	5
chr4	97603681	97603990	5
chr5	137521266	137521575	5
chr2	29147459	29147768	5
chr13	115705225	115705535	5
chr8	73019421	73019731	5
chr11	56987748	56988058	5
chr12	111315782	111316092	5
chr8	97522886	97523196	5
chr1	43561085	43561395	5
chr11	98605730	98606040	5
chr2	27595706	27596016	5
chrX	48287803	48288114	5
chr4	81271240	81271552	5
chr9	57679237	57679550	5
chr8	87511845	87512158	5
chr4	137270045	137270359	5
chr12	109606084	109606398	5
chr16	10758157	10758571	5
chr4	149813581	149813896	5
chr7	77492310	77492625	5
chr19	58362931	58363246	5
chr10	67694363	67694679	5
chr4	119650479	119650795	5
chr3	148222076	148222392	5
chr11	84542546	84542863	5
chr2	127160909	127161226	5
chr4	148241979	148242445	5
chr9	91912655	91912973	5
chr9	61656501	61656819	5
chr13	101789251	101789569	5
chr2	92485535	92485853	5
chr1	186822873	186823191	5
chr17	28314539	28314858	5
chr13	48254654	48254973	5
chr7	90020709	90021028	5
chr2	166464325	166464644	5
chr8	18738740	18739156	5
chr8	27955066	27955386	5
chr4	54483820	54484141	5
chr2	26410752	26411073	5
chr11	43198741	43199158	5
chr18	55060072	55060394	5
chr1	136953349	136953672	5
chr2	38590089	38590413	5
chr18	80805200	80805524	5
chr2	26412253	26412578	5
chr5	114734864	114735189	5
chr19	61133389	61133714	5
chr3	37745571	37745896	5
chr6	127189791	127190210	5
chr7	36941419	36941745	5
chr12	111470267	111470736	5
chr4	45197179	45197507	5
chr1	36637035	36637363	5
chr12	80914272	80914601	5
chr2	85003789	85004118	5
chr12	34647059	34647388	5
chr5	12080161	12080490	5
chr6	144587012	144587342	5
chr19	6384907	6385237	5
chr7	25270322	25270652	5
chr8	8489035	8489366	5
chr4	57447466	57447797	5
chr11	98966432	98966764	5
chr17	49203091	49203423	5
chr2	69423445	69423777	5
chr14	26300728	26301060	5
chr2	74927837	74928171	5
chr16	55505054	55505389	5
chr14	69595379	69595715	5
chr11	117823584	117823920	5
chr6	88097498	88097834	5
chr1	20292141	20292477	5
chr14	118909676	118910012	5
chr2	27588497	27588921	5
chr8	118266589	118266926	5
chr1	34068021	34068358	5
chr11	100388726	100389063	5
chr9	68503738	68504077	5
chr8	122710111	122710450	5
chr7	17479781	17480207	5
chr12	72964977	72965318	5
chr11	120117769	120118110	5
chr2	103502254	103502595	5
chr7	26091438	26091780	5
chr15	61372553	61372895	5
chr2	152642109	152642536	5
chr13	55056811	55057154	5
chr1	130601678	130602021	5
chr1	180530907	180531250	5
chr11	79552702	79553045	5
chr14	20983362	20983706	5
chr18	76061271	76061616	5
chr17	45894251	45894596	5
chr3	30056780	30057127	5
chr5	112199314	112199662	5
chr10	18906128	18906476	5
chr17	84678435	84678865	5
chr11	96598995	96599345	5
chr12	16516053	16516404	5
chr6	72739278	72739629	5
chr11	52113158	52113509	5
chr7	4732850	4733201	5
chr5	119380185	119380536	5
chr7	117941325	117941676	5
chr1	73805079	73805431	5
chr2	74952130	74952482	5
chr4	49071007	49071360	5
chr11	98922039	98922392	5
chr9	95027568	95028001	5
chr19	5050136	5050490	5
chr17	62386371	62386725	5
chr4	153845621	153845976	5
chr7	17430512	17430868	5
chr3	108012881	108013237	5
chr1	174230518	174230874	5
chr12	106040219	106040576	5
chr6	114042166	114042523	5
chr5	114291671	114292028	5
chr11	45936138	45936496	5
chr8	4166812	4167170	5
chr4	41043325	41043761	5
chr16	5131703	5132062	5
chr11	94101098	94101458	5
chr8	46022883	46023243	5
chr8	123824642	123825125	5
chr15	79840052	79840413	5
chr6	84197002	84197363	5
chr14	47281775	47282136	5
chr4	119954959	119955320	5
chr13	28977769	28978132	5
chr15	79855942	79856305	5
chr19	43675526	43675890	5
chr11	44554321	44554685	5
chr4	125934184	125934548	5
chr13	37918850	37919214	5
chr16	18712834	18713198	5
