# Supplementary material for: Automated Discovery of Tissue-Targeting Enhancers and Transcription Factors from Binding Motif and Gene Function Data
Source: PLOS journal article supplement (doi:10.1371/journal.pcbi.1003449), 2014-01-30
Supplement: S23 (10.1371/journal.pcbi.1003449.s023) [file journal.pcbi.1003449.s023]

| **Tissue/Process** | **Term** | **#Genes** |
| --- | --- | --- |
| Bone Marrow | abnormal bone marrow cell morphology | 1047 |
| Blood Vessel | abnormal blood vessel morphology | 908 |
| Placenta | abnormal placenta morphology | 362 |
| Liver | abnormal liver size | 347 |
| Heart | heart development | 340 |
| Pancreas | pancreas development | 75 |
