# Supplementary figures and images for: Automated Discovery of Tissue-Targeting Enhancers and Transcription Factors from Binding Motif and Gene Function Data
Source: PLOS journal article supplement (doi:10.1371/journal.pcbi.1003449), 2014-01-30

# TFs associated with placenta development

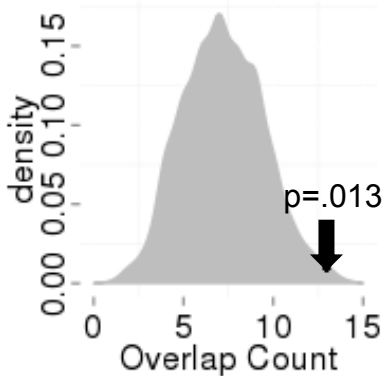

Wilcoxon rank-sum  
p-value:  $4 \times 10^{-3}$

Supplement: S1 (10.1371/journal.pcbi.1003449.s001) [file journal.pcbi.1003449.s001]
